# Supplementary material
Source: PubMed Central journal article supplement (PMC6613590)
Supplement: NIHMS1033389-supplement-Online_Appendices.pdf [file NIHMS1033389-supplement-Online_Appendices.pdf]

**Appendix Table 1.** Key Questions for Updated Systematic Review on Impact of Contraceptive Counseling in Clinical Settings

| <b>Number</b> | <b>Question</b>                                                                                                                                                                                                                                                                                                                                                                                                                                                                                                                                                                                                                                                            |
|---------------|----------------------------------------------------------------------------------------------------------------------------------------------------------------------------------------------------------------------------------------------------------------------------------------------------------------------------------------------------------------------------------------------------------------------------------------------------------------------------------------------------------------------------------------------------------------------------------------------------------------------------------------------------------------------------|
| Q1            | Is there a relationship between contraceptive counseling and improved long-term outcomes of family planning services (e.g., decreased teen or unintended pregnancies, decreased abortion rates, increased birth spacing, increased achievement of desired family size, improved infant health, increased value-based care, decreased per capita costs, high return on investment)?                                                                                                                                                                                                                                                                                         |
| Q2            | Is there a relationship between contraceptive counseling and improved medium-term outcomes of family planning services (e.g., increased contraceptive use, increased use of more effective contraception, increased correct use of contraception, increased consistent use of contraception, increased continuation of contraception use, increased use of dual contraceptive methods, increased use of services, increased repeat or follow-up service use)?                                                                                                                                                                                                              |
| Q3            | Is there a relationship between contraceptive counseling and improved client experiences (e.g., perception that services are client-centered and equitable, satisfaction with services) or short-term outcomes of family planning services (e.g., increased knowledge or awareness, increased participation in the decision-making process, increased intentions to use contraception, increased intentions to use services, increased acceptance by the community, strengthened social norms, improved parent or partner involvement or community, increased intentions to delay sexual initiation, enhancement of other psychosocial determinants of contraceptive use)? |
| Q4            | What are the barriers and facilitators for clinics in adopting and implementing contraceptive counseling in the family planning setting?                                                                                                                                                                                                                                                                                                                                                                                                                                                                                                                                   |
| Q5            | Are there any unintended negative consequences associated with contraceptive counseling when used in the family planning setting?                                                                                                                                                                                                                                                                                                                                                                                                                                                                                                                                          |
| Q6            | What are clients' preferences with regard to contraceptive counseling approaches in the family planning setting?                                                                                                                                                                                                                                                                                                                                                                                                                                                                                                                                                           |

*Note:* Questions are put into context by the analytic framework presented in Appendix Figure 1.

**Appendix**  
**Contraceptive Counseling in Clinical Settings: An Updated Systematic Review**  
**Zapata et al.**

**Appendix Figure 1.** Analytic framework for updated systematic review on the impact of contraceptive counseling in clinical settings.

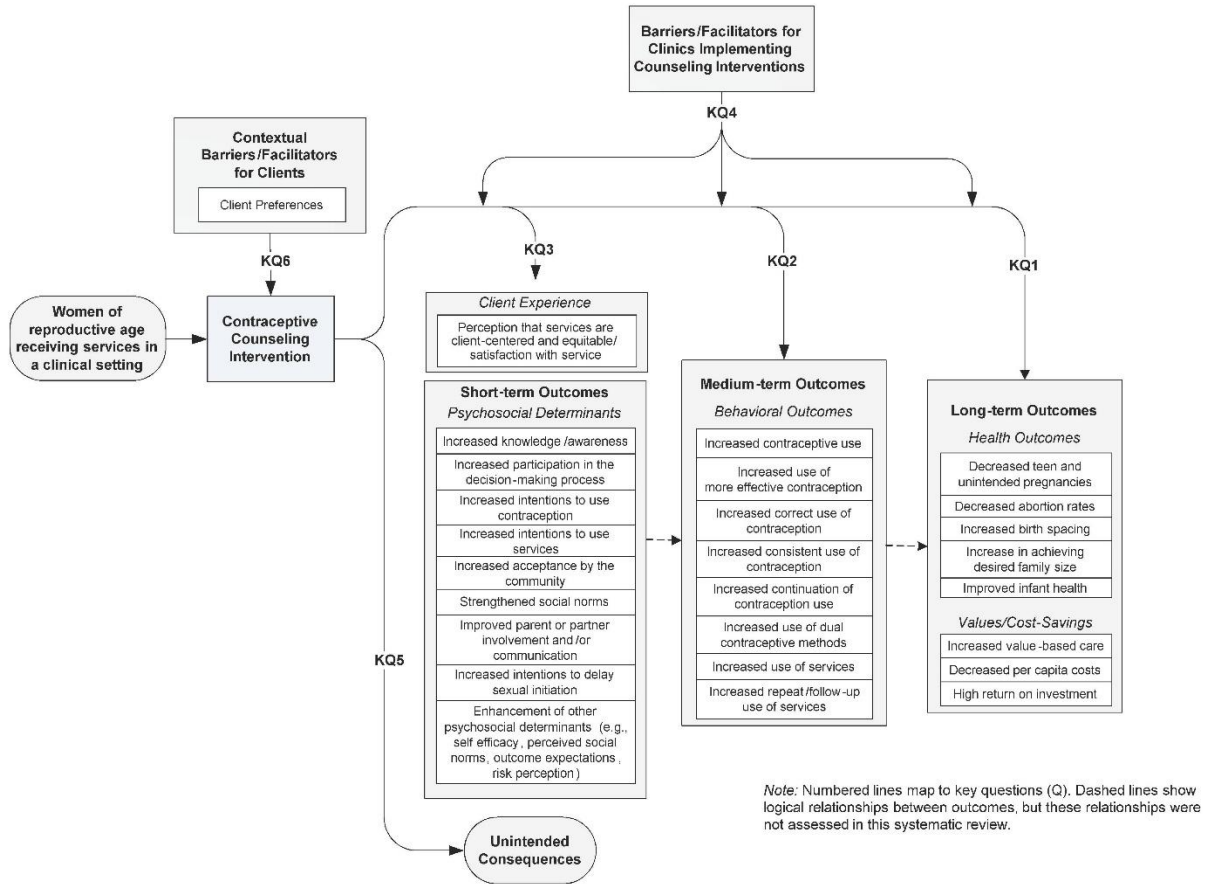

**Appendix Table 2.** Search Terms and Strategy Used in the Updated Systematic Review

| Set # | Concept         | PubMed search terms <sup>a</sup>                                                                                                                                                                                                                                                                                                                                                                                                                                                                                                                                                                                                                                                                                                                                                                                                                                                                                                                                                                                                                                        |
|-------|-----------------|-------------------------------------------------------------------------------------------------------------------------------------------------------------------------------------------------------------------------------------------------------------------------------------------------------------------------------------------------------------------------------------------------------------------------------------------------------------------------------------------------------------------------------------------------------------------------------------------------------------------------------------------------------------------------------------------------------------------------------------------------------------------------------------------------------------------------------------------------------------------------------------------------------------------------------------------------------------------------------------------------------------------------------------------------------------------------|
| 1     | Family planning | “family planning”[All fields] OR “family planning services”[MeSH] <sup>b</sup> OR “family planning services”[All fields] OR “family planning policy”[MeSH] OR “family planning policy”[All fields] OR “reproductive health services”[MeSH] OR “reproductive health services”[All fields] OR “Title X”[All fields] OR “Planned Parenthood”[All fields]                                                                                                                                                                                                                                                                                                                                                                                                                                                                                                                                                                                                                                                                                                                   |
| 2     | Contraception   | contraception[MeSH] OR contracept*[All fields] OR “contraceptive agents”[MeSH] OR “contraceptive agents”[All fields] OR “contraceptive devices”[MeSH] OR “contraceptive devices”[All fields] OR “birth control”[All fields] OR “contraception behavior”[MeSH] OR “contraception behavior”[All fields]                                                                                                                                                                                                                                                                                                                                                                                                                                                                                                                                                                                                                                                                                                                                                                   |
| 3     | Counseling      | counseling[MeSH] OR counseling[All fields] OR “patient-centered”[All fields] OR “patient comprehension”[All fields] OR “patient understanding”[All fields] OR “patient participation”[MeSH] OR “patient participation”[All fields] OR “patient autonomy”[All fields] OR “decision making”[MeSH] OR “decision making”[All fields] OR “active decision”[All fields] OR “informed decision”[All fields] OR “informed choice”[All fields] OR “informed patient”[All fields] OR “informed client”[All fields] OR “informed consent”[MeSH] OR “informed consent”[All fields]                                                                                                                                                                                                                                                                                                                                                                                                                                                                                                  |
| 4     | Communication   | “communication”[All fields] OR “health communication”[MeSH] OR “health communication”[All fields] OR “risk communication”[All fields] OR “communicating risk”[All fields] OR “communication barriers”[MeSH] OR “communication barriers”[All fields] OR “patient communication”[All fields] OR “professional-patient relations”[MeSH:NoExp] OR “professional-patient relations”[All fields] OR “nurse-patient relations”[MeSH] OR “nurse-patient relations”[All fields] OR “physician-patient relations”[MeSH] OR “physician-patient relations”[All fields] OR “information dissemination”[MeSH] OR “information dissemination”[All fields] OR “access to information”[MeSH] OR “access to information”[All fields] OR “information seeking behavior”[MeSH] OR “information seeking behavior”[All fields] OR “truth disclosure”[MeSH] OR “truth disclosure”[All fields] OR “risk perception”[All fields] OR “perceived risk”[All fields] OR “perception of risk”[All fields] OR “risk management”[MeSH] OR “risk management”[All fields] OR “patient safety”[All fields] |

**Appendix**  
**Contraceptive Counseling in Clinical Settings: An Updated Systematic Review**  
**Zapata et al.**

|   |                                         |                                                                                                                                                                                                                                                                        |
|---|-----------------------------------------|------------------------------------------------------------------------------------------------------------------------------------------------------------------------------------------------------------------------------------------------------------------------|
| 5 | Follow-up/Continuity of care            | “continuity of patient care”[MeSH] OR “continuity of patient care”[All fields] OR “followup”[All fields] OR “follow up”[All fields]                                                                                                                                    |
| 6 | Education                               | “health education”[MeSH] OR “health education”[All fields] OR “health educator”[All fields] OR “patient education as topic”[MeSH] OR “patient education”[All fields] OR “health literacy”[All fields]                                                                  |
| 7 | Adolescents                             | adolescent[MeSH] OR adolescen*[All fields] OR “adolescent behavior”[MeSH] OR “adolescent behavior”[All fields] OR “adolescent development”[MeSH] OR “adolescent development”[All fields] OR “pregnancy in adolescence”[MeSH] OR “pregnancy in adolescence”[All fields] |
| 8 | All sets combined (without adolescents) | ((#1) OR (#2)) AND ((#3) OR (#4) OR (#5) OR (#6))                                                                                                                                                                                                                      |
| 9 | All sets combined (with adolescents)    | (#7) AND (#8)                                                                                                                                                                                                                                                          |

<sup>a</sup>Adapted, as needed, for searches of other databases. Other electronic databases searched were CINAHL, PsychINFO, HealthSTAR, POPLINE, EMBASE, MEDLINE, Education Resources of Information Center (ERIC), Cochrane Database of Systematic Reviews (CDSR), Cochrane Central Register of Controlled Trials (CENTRAL), Database of Abstracts of Reviews of Effects (DARE), UK NHS Economic Evaluation Database (NHS EED), National Guideline Clearinghouse, UK National Institute of Clinical Excellence (NICE), Evidence for Policy and Practice Information and Coordinating Centre (EPPI-Centre), and Turning Research into Practice (TRIP).

<sup>b</sup>Medical Subject Headings.

**Appendix**  
**Contraceptive Counseling in Clinical Settings: An Updated Systematic Review**  
**Zapata et al.**

**Appendix Table 3.** Evidence on Impact of Contraceptive Counseling in Clinical Settings for Adolescents and Young Adults

| Reference/<br>Funding                                 | Design/<br>Setting                                                                                                                                              | Population                                                                                                                                                                                                           | Intervention                                                                                                                                                                                                                                                                                                                               | Outcomes                                                                                                                                                                                              | Results                                                                                                                                                                                                                                                                                                                                                                                                           | Quality                                                                                                                                                                                                                                                                                                                                                             |
|-------------------------------------------------------|-----------------------------------------------------------------------------------------------------------------------------------------------------------------|----------------------------------------------------------------------------------------------------------------------------------------------------------------------------------------------------------------------|--------------------------------------------------------------------------------------------------------------------------------------------------------------------------------------------------------------------------------------------------------------------------------------------------------------------------------------------|-------------------------------------------------------------------------------------------------------------------------------------------------------------------------------------------------------|-------------------------------------------------------------------------------------------------------------------------------------------------------------------------------------------------------------------------------------------------------------------------------------------------------------------------------------------------------------------------------------------------------------------|---------------------------------------------------------------------------------------------------------------------------------------------------------------------------------------------------------------------------------------------------------------------------------------------------------------------------------------------------------------------|
| Berger (1987)<br><br>Funding source<br>NR<br><br>U.S. | Pre-post study; 1<br>study group<br><br>Urban adolescent<br>clinic, NYC<br><br>FU=average of 7.8<br>months (range 2–<br>12 months)                              | 383 unmarried<br>youth, aged 11–<br>19 years;<br>61% female; 73%<br>Hispanic; 45%<br>Medicaid<br>eligible; 35%<br>sexually active<br><br>Recruitment: NR                                                             | Discussions on<br>establishing sexual<br>values, ability and right<br>to refuse sexual<br>intercourse, abstinence<br>and alternate forms of<br>intimacy, contraceptive<br>methods, and<br>consequences of<br>unprotected sex<br><br>Variable frequency but<br>2 visit minimum                                                              | <u>Medium-term:</u><br>increase<br>contraceptive use<br><br><u>Other:</u> unintended<br>negative<br>consequences                                                                                      | Contraceptive use<br>at last sex among<br>sexually active<br>youth significantly<br>( $p<0.001$ )<br>increased from<br>baseline to FU<br>from 22% to 70%<br>for females and<br>from 34% to 85%<br>for males<br><br>Counseling did not<br>appear to promote<br>entry into sexual<br>activity among<br>nonsexually active<br>youth (3% of<br>nonsexually active<br>youth initiated<br>sexual activity<br>during FU) | Level II-3; high risk<br>for bias<br><br><u>Strengths:</u><br>Staff received training<br>on protocol<br><br><u>Weaknesses:</u><br>Self-report bias<br><br>Recall bias<br><br>High attrition<br><br>Maturation bias<br><br>Only 5% of youth<br>presented to clinic for<br>FP reasons<br><br>Selection bias (those<br>not returning to clinic<br>excluded; number NR) |
| Winter (1991)<br><br>Ford<br>Foundation<br><br>U.S.   | CT; 2 study<br>groups.<br><br>6 non-<br>metropolitan FP<br>clinics,<br>Pennsylvania (3<br>control clinics and<br>3 experimental<br>clinics)<br><br>FU=12 months | 1,256 females<br>aged 18 years and<br>younger;<br>98% white, NH<br><br>Baseline data<br>collected with<br>$n=251$ ( $n=93$ in<br>experimental and<br>$n=158$ in control<br>groups; control<br>group received<br>SOC) | Psychosocial model that<br>provided counseling,<br>education, reassurance,<br>and social support;<br>addressed peer pressure,<br>parental involvement,<br>confidential services,<br>used visual aids to make<br>information concrete,<br>and scheduled initial<br>visit as two<br>appointments—1 for<br>information, 1 for<br>medical exam | <u>Long-term:</u><br>decrease teen<br>pregnancy<br><br><u>Medium-term:</u><br>increase<br>contraceptive use,<br>increase<br>continuation of<br>use<br><br><u>Short-term:</u><br>improve<br>knowledge, | Pregnancy rate<br>among intervention<br>group from original<br>sample (3%) was<br>lower than that of<br>control group from<br>original sample<br>(6%), but<br>differences were<br>not statistically<br>significant at<br>$p<0.05$                                                                                                                                                                                 | Level II-1; high risk<br>for bias<br><br><u>Strengths:</u><br>FU time $\geq 1$ year<br><br>Instruments had<br>evidence of validity<br><br>Staff received training<br>in adolescent<br>psychosocial<br>development                                                                                                                                                   |

**Appendix**  
**Contraceptive Counseling in Clinical Settings: An Updated Systematic Review**  
**Zapata et al.**

|              |                     |                                                                                                                                                                                                                                                                                                                                                                                                                                                                             |                                                                     |                                                                                                                                 |                                                                                                                                                                                                                                                                                                                                                                                                                                                                                                                                                                                                         |                                                                                                                                                                                                                                                                                                                                                                                                                                                                                                                                                                                         |
|--------------|---------------------|-----------------------------------------------------------------------------------------------------------------------------------------------------------------------------------------------------------------------------------------------------------------------------------------------------------------------------------------------------------------------------------------------------------------------------------------------------------------------------|---------------------------------------------------------------------|---------------------------------------------------------------------------------------------------------------------------------|---------------------------------------------------------------------------------------------------------------------------------------------------------------------------------------------------------------------------------------------------------------------------------------------------------------------------------------------------------------------------------------------------------------------------------------------------------------------------------------------------------------------------------------------------------------------------------------------------------|-----------------------------------------------------------------------------------------------------------------------------------------------------------------------------------------------------------------------------------------------------------------------------------------------------------------------------------------------------------------------------------------------------------------------------------------------------------------------------------------------------------------------------------------------------------------------------------------|
|              |                     | <p>Treatment phase data collected with n=1,005 (n=425 in experimental and n=580 in control groups)</p> <p>FU at 6 months: n= ~236 in experimental and n= ~489 in control groups (calculated from manuscript data)</p> <p>FU at 12 months: n= ~166 in experimental and n= ~221 in control groups (calculated from manuscript data)</p> <p>Recruitment: personal information form administered at clinic reception area used to identify adolescents at high risk for UIP</p> | <p>Frequency: initial plus 6 month FU</p>                           | <p>enhance other psychosocial determinants of contraceptive use</p> <p><u>Client experiences:</u> satisfaction with service</p> | <p>Significantly (<math>p&lt;0.05</math>) more intervention females were using some method at 6 months (97%), and using chosen method at 6 (92%) and 12 (90%) months vs control group females (92%, 85%, and 83%, respectively)</p> <p>Intervention group reported significantly (<math>p&lt;0.05</math>) greater ease coping with contraceptive related problems at 6 months FU</p> <p>Intervention group had significantly improved knowledge from baseline to FU (<math>F=4.59, p=0.032</math>); no difference in control group</p> <p>No significant differences between groups in satisfaction</p> | <p>Weaknesses:<br/>Self-selection bias</p> <p>Participation rate unknown</p> <p>Comparability of groups questionable (baseline data not collected for 80% of participants); experimental sites had elevated satisfaction scores at baseline.</p> <p>High attrition</p> <p>FU rate <math>\geq 15\%</math> different between groups at 6 months (~56% for experimental and 89% for control groups); similar at 12 months (39% and 38%, respectively)</p> <p>No comparison of completers and noncompleters performed</p> <p>Self-report bias</p> <p>Unclear how pregnancy was measured</p> |
| Hanna (1993) | RCT; 2 study groups | 51 unmarried females aged 16–18 years seeking                                                                                                                                                                                                                                                                                                                                                                                                                               | Based on King’s theory of goal achievement through transactions and | <u>Medium-term:</u> increase correct use                                                                                        | Intervention group demonstrated increased correct                                                                                                                                                                                                                                                                                                                                                                                                                                                                                                                                                       | Level I; moderate risk for bias                                                                                                                                                                                                                                                                                                                                                                                                                                                                                                                                                         |

**Appendix**  
**Contraceptive Counseling in Clinical Settings: An Updated Systematic Review**  
**Zapata et al.**

|                                           |                                                                                                              |                                                                                                                                                                                                    |                                                                                                                                                                                                                                                                                                                        |                                                                                                       |                                                                                                                                                                                                |                                                                                                                                                                                                                                                                                                       |
|-------------------------------------------|--------------------------------------------------------------------------------------------------------------|----------------------------------------------------------------------------------------------------------------------------------------------------------------------------------------------------|------------------------------------------------------------------------------------------------------------------------------------------------------------------------------------------------------------------------------------------------------------------------------------------------------------------------|-------------------------------------------------------------------------------------------------------|------------------------------------------------------------------------------------------------------------------------------------------------------------------------------------------------|-------------------------------------------------------------------------------------------------------------------------------------------------------------------------------------------------------------------------------------------------------------------------------------------------------|
| Funding source<br>NR                      | 2 rural FP clinics,<br>Midwest                                                                               | OCs for first<br>time; 98% white,<br>NH                                                                                                                                                            | the Health Belief<br>Model; included<br>personalized<br>discussions on maturity,<br>responsibility, decision-<br>making, benefits and<br>barriers of contraceptive<br>use, potential barriers to<br>correct use, and<br>developing plans to<br>manage perceived<br>barriers.                                           | <u>Short-term:</u><br>enhance other<br>psychosocial<br>determinants of<br>contraceptive use           | use of OCs (less<br>frequently missed<br>pills) vs control<br>group (F=4.15,<br>p=0.049)                                                                                                       | <u>Strengths:</u><br>Providers received<br>training on protocol<br><br>85% participation rate                                                                                                                                                                                                         |
| U.S.                                      | FU=3 months                                                                                                  | Intervention<br>group (n=26);<br>control group<br>(n=25); control<br>group received<br>SOC<br><br>Potential<br>enrollees:<br>n=60<br>Completed study:<br>n=39<br><br>Recruitment: NR               | Single session                                                                                                                                                                                                                                                                                                         |                                                                                                       | No significant<br>differences<br>between groups<br>related to<br>contraceptive<br>perceptions<br>(perceived benefits<br>and barriers)                                                          | Comparable study<br>groups related to age<br><br><u>Weaknesses:</u><br>Low reliability of<br>instrument<br><br>Self-report bias<br><br>Recall bias<br><br>Small sample<br><br>Short FU time for<br>behavioral outcomes<br><br>Blinding NR<br><br>Allocation procedures<br>including concealment<br>NR |
| Cowley (2002)<br><br>Funding source<br>NR | Pre-post study; 1<br>study group<br><br>Semi-rural<br>comprehensive<br>adolescent health<br>clinic, Colorado | 39 females aged<br>13–18 years<br>considered high<br>risk for early<br>pregnancy with<br>ambivalent<br>pregnancy<br>intentions or<br>desiring<br>pregnancy<br><br>Enrolled: n=40<br>(68% Hispanic) | Detailed exploration,<br>using motivational<br>interviewing and<br>narrative therapy, of 6<br>areas: impact of<br>childbearing on life<br>goals; youth hopes and<br>dreams for future; long-<br>term expectations for<br>current relationship;<br>reaction of parents if<br>pregnancy were to<br>occur; current health | <u>Medium-term:</u><br>increase<br>contraceptive use,<br>increase use of<br>more effective<br>methods | 15/39 (38%) began<br>contraception with<br>5/39 (13%)<br>choosing DMPA<br>and 10/39 (26%)<br>choosing OCs; on<br>average, users<br>made 3 clinic visits<br>before requesting<br>contraceptives | Level II-3; high risk<br>for bias<br><br><u>Strengths:</u><br>Providers received<br>training<br><br>Used standard<br>provider tool (e.g.,<br>Decisional Balance<br>Sheet)<br><br><u>Weaknesses:</u>                                                                                                   |

**Appendix**  
**Contraceptive Counseling in Clinical Settings: An Updated Systematic Review**  
**Zapata et al.**

|                                     |                                                                                                                       |                                                                                                                                                                                                                                                                                                               |                                                                                                                                                                                                                                                                                                                                                                                                   |                                                                                                                                                                                                                               |                                                                                                                                                                                                                                                                                        |                                                                                                                                                                                                                                                                                                                                                              |
|-------------------------------------|-----------------------------------------------------------------------------------------------------------------------|---------------------------------------------------------------------------------------------------------------------------------------------------------------------------------------------------------------------------------------------------------------------------------------------------------------|---------------------------------------------------------------------------------------------------------------------------------------------------------------------------------------------------------------------------------------------------------------------------------------------------------------------------------------------------------------------------------------------------|-------------------------------------------------------------------------------------------------------------------------------------------------------------------------------------------------------------------------------|----------------------------------------------------------------------------------------------------------------------------------------------------------------------------------------------------------------------------------------------------------------------------------------|--------------------------------------------------------------------------------------------------------------------------------------------------------------------------------------------------------------------------------------------------------------------------------------------------------------------------------------------------------------|
|                                     |                                                                                                                       | Recruitment: youth seeking RH services (most seeking pregnancy testing) serially asked to participate                                                                                                                                                                                                         | status; pros and cons of current vs delayed pregnancy; followed the FRAMES-D approach to counseling: feedback, responsibility, and advice-giving, menu of options, empathy, and self-efficacy                                                                                                                                                                                                     |                                                                                                                                                                                                                               |                                                                                                                                                                                                                                                                                        | Small sample<br>Self-selection bias<br>Recall bias<br>Some (40%) enrolled youth desired pregnancy                                                                                                                                                                                                                                                            |
| Brindis (2005)                      | Pre-post study; 1 study group                                                                                         | 1,590 sexually active youth, aged ≤14–20 years; 90% female; ~40% Hispanic                                                                                                                                                                                                                                     | Single session<br>Peer provider approach with peers meeting with participants at intake and making FU calls (females only) shortly after first visit and quarterly afterwards to reinforce messages, answer questions, etc. Peer providers staff toll-free teen line, which youth can call to receive advice and information, schedule a clinic appointment, and get referrals for other services | <u>Long-term:</u> decrease teen pregnancy<br><br><u>Medium-term:</u> increase contraceptive use, increase use of more effective methods, increase repeat/FU service use<br><br><u>Other:</u> unintended negative consequences | Females demonstrated significant ( $p<0.01$ ) changes from first to last visit in always using birth control (42% vs 61%, OR=1.9), contraceptive use at last intercourse (61% vs 74%, OR=1.8), and use of effective methods (10% vs 49%, OR=3.5); no significant differences for males | Level II-3; high risk for bias<br><br><u>Strengths:</u><br>Peer providers received training.<br><br>Pregnancy tests used<br><br><u>Weaknesses:</u><br>Self-report bias<br>Recall bias<br>High attrition<br>Selection bias (those not returning to clinic 90 days after initial visit [33%] excluded)<br><br>FU time between first to last visit not reported |
| California Wellness Foundation U.S. | 1 of 5 peer provider RH clinics, California<br><br>FU=up to 36 months<br><br>Compared clinic only vs clinic-telephone | Completed initial survey: females, n=7,486; males, n=2,151<br><br>Exclusions: females, n=6,062; males, n=1,985; reasons for exclusion included not being sexually active, not receiving a FP visit or male exam during initial visit, or not making a FU visit 3 months later<br><br>Recruitment: individuals | Variable frequency                                                                                                                                                                                                                                                                                                                                                                                |                                                                                                                                                                                                                               | As compared with females receiving clinic- only intervention, females receiving FU telephone calls had significantly ( $p<0.05$ ) increased odds of returning                                                                                                                          |                                                                                                                                                                                                                                                                                                                                                              |



**Appendix**  
**Contraceptive Counseling in Clinical Settings: An Updated Systematic Review**  
**Zapata et al.**

|                                      |                                                                   |                                                                                       |                                                                                                                                                                                                                                         |                                                                                                      |                                                                                                                                                                                                      |                                                                                         |
|--------------------------------------|-------------------------------------------------------------------|---------------------------------------------------------------------------------------|-----------------------------------------------------------------------------------------------------------------------------------------------------------------------------------------------------------------------------------------|------------------------------------------------------------------------------------------------------|------------------------------------------------------------------------------------------------------------------------------------------------------------------------------------------------------|-----------------------------------------------------------------------------------------|
|                                      |                                                                   | requested clinic visit                                                                |                                                                                                                                                                                                                                         |                                                                                                      | for annual exam (OR=1.4) and decreased odds of positive pregnancy test at any FU clinic visits (OR=0.9)                                                                                              |                                                                                         |
|                                      |                                                                   |                                                                                       |                                                                                                                                                                                                                                         |                                                                                                      | Female participants reported decreased likelihood of condom use (OR=0.7, $p<0.01$ ) from first to last visit                                                                                         |                                                                                         |
| Kirby (2010)                         | RCT; 2 study groups                                               | 805 sexually active females aged 14–18 years                                          | Regular services plus 9 FU telephone calls over 12 months that incorporated motivational interviewing to identify discrepancies in current risky behaviors and goals and to reinforce messages (e.g., effectiveness of hormonal method) | <u>Long-term:</u> decrease teen pregnancy                                                            | While study participants as a whole reported an increase in contraceptive use at last intercourse, from 11% at baseline to 44% at 6 months, FU calls did not have any further impact on this outcome | Level I; moderate risk for bias                                                         |
| William and Flora Hewlett Foundation | RH clinic affiliated with University of California, San Francisco | Intervention: n=402 (45% Latina; 75% attending HS; 7% married)                        | Frequency: monthly/bimonthly                                                                                                                                                                                                            | <u>Medium-term:</u> increase contraceptive use, increase correct use, increase repeat/FU service use | Intervention did not demonstrate any effect on pregnancy rates; correct use of condoms, OCs, injectables, or patch; number of clinic visits; or satisfaction with services (data not shown)          | <u>Strengths:</u> Comparable study groups related to age, education, and marital status |
| U.S.                                 | FU= ~21 months                                                    | Control: n=403 (35% Latina; 75% attending HS; 8% married); control group received SOC | Recruitment: research staff and clinicians identified and approached potential participants at clinic                                                                                                                                   | <u>Client experiences:</u> satisfaction with services                                                | Analyses adjusted for confounding variables                                                                                                                                                          | Analyses adjusted for confounding variables                                             |
|                                      |                                                                   |                                                                                       |                                                                                                                                                                                                                                         |                                                                                                      |                                                                                                                                                                                                      | FU time $\geq 1$ year                                                                   |
|                                      |                                                                   |                                                                                       |                                                                                                                                                                                                                                         |                                                                                                      |                                                                                                                                                                                                      | Counselors received training on protocol                                                |
|                                      |                                                                   |                                                                                       |                                                                                                                                                                                                                                         |                                                                                                      |                                                                                                                                                                                                      | Randomization assignment made using random number generator                             |
|                                      |                                                                   |                                                                                       |                                                                                                                                                                                                                                         |                                                                                                      |                                                                                                                                                                                                      | <u>Weaknesses:</u> Self-selection bias                                                  |

**Appendix**  
**Contraceptive Counseling in Clinical Settings: An Updated Systematic Review**  
**Zapata et al.**

|                            |                                                                                                                                 |                                                                                                                                                                              |                                                                                                                                                                                                                                                                                                                                           |                                                                                                |                                                                                                                                                                                                                                                                                        |                                                                                                                                                                                                                                                                  |
|----------------------------|---------------------------------------------------------------------------------------------------------------------------------|------------------------------------------------------------------------------------------------------------------------------------------------------------------------------|-------------------------------------------------------------------------------------------------------------------------------------------------------------------------------------------------------------------------------------------------------------------------------------------------------------------------------------------|------------------------------------------------------------------------------------------------|----------------------------------------------------------------------------------------------------------------------------------------------------------------------------------------------------------------------------------------------------------------------------------------|------------------------------------------------------------------------------------------------------------------------------------------------------------------------------------------------------------------------------------------------------------------|
|                            |                                                                                                                                 |                                                                                                                                                                              |                                                                                                                                                                                                                                                                                                                                           |                                                                                                | Although 89% of intervention group received at least 1 FU call, only 35% recalled receiving the calls                                                                                                                                                                                  | Self-report bias<br>Recall bias<br>Poor intervention completion rates (i.e., counselors averaged ~2.7 of 9 completed calls per participant<br><br>Unclear how pregnancy was measured<br><br>Blinding NR<br><br>Allocation concealment NR                         |
| Martin (2011) <sup>a</sup> | Pre-post study with a historical comparison group; 2 study groups                                                               | Intervention group: 87 adolescents aged 14–19 years using a user-dependent contraceptive method (injections, pills, condoms) recruited September–December 2007) with FU data | Trained sexual health clinicians worked with clients during contraceptive consultations to develop individually tailored ‘if-then’ plans to increase contraceptive adherence and overcome potential barriers to adherence. “If-then” planning is a technique to change individual behavior by linking situations with a desired behavior. | <u>Medium-term:</u> repeat/FU service use (decrease repeat visits for EC or pregnancy testing) | Consultation for EC or pregnancy testing decreased from baseline (49%) to FU (34%) among youth in the intervention group (significance testing not conducted). This compares to a small non-significant reduction among youth in the control group (from 57% at baseline to 53% at FU) | Level II-3; high risk for bias                                                                                                                                                                                                                                   |
| Martin (2009) <sup>a</sup> | Pre-intervention: 9-month baseline period<br>Post-intervention: 9-month FU period                                               | Control group: 131 teen girls (mean age 16.7 years) recruited during 11-week period (dates NR) who received                                                                  | During consultations, clinicians: (1) introduced planning to young women; (2) identified a suitable target behavior(s) for a plan; (3) developed a                                                                                                                                                                                        |                                                                                                |                                                                                                                                                                                                                                                                                        | <u>Strengths:</u><br>Staff received training on protocol<br><br>Sample size calculations conducted<br><br>Outcomes assessed using electronic medical records<br><br><u>Weaknesses:</u><br>Single site<br><br>Recruitment rate among intervention participants NR |
| Funding source NR          |                                                                                                                                 |                                                                                                                                                                              |                                                                                                                                                                                                                                                                                                                                           |                                                                                                |                                                                                                                                                                                                                                                                                        |                                                                                                                                                                                                                                                                  |
| UK                         | National Health Service family planning clinic in a northern UK city with higher than national average levels of teen pregnancy |                                                                                                                                                                              |                                                                                                                                                                                                                                                                                                                                           |                                                                                                | Among youth who visited the clinic at baseline for EC or                                                                                                                                                                                                                               |                                                                                                                                                                                                                                                                  |

**Appendix**  
**Contraceptive Counseling in Clinical Settings: An Updated Systematic Review**  
**Zapata et al.**

|                                                                                                                     |                                                                                                                                                                                                    |                                                                                                                                                                      |                                                                                                                                                                                                                                                                                                                                                                                                                   |                                                                                                                                                                                                                                                                                |                                                                                                                                                                                                                                                                                                                                                         |                                                                                                                                                                                                                                                                          |
|---------------------------------------------------------------------------------------------------------------------|----------------------------------------------------------------------------------------------------------------------------------------------------------------------------------------------------|----------------------------------------------------------------------------------------------------------------------------------------------------------------------|-------------------------------------------------------------------------------------------------------------------------------------------------------------------------------------------------------------------------------------------------------------------------------------------------------------------------------------------------------------------------------------------------------------------|--------------------------------------------------------------------------------------------------------------------------------------------------------------------------------------------------------------------------------------------------------------------------------|---------------------------------------------------------------------------------------------------------------------------------------------------------------------------------------------------------------------------------------------------------------------------------------------------------------------------------------------------------|--------------------------------------------------------------------------------------------------------------------------------------------------------------------------------------------------------------------------------------------------------------------------|
|                                                                                                                     |                                                                                                                                                                                                    | SOC; 106 (81%) with FU data                                                                                                                                          | plan(s) by working through the when, where, how of the behavior; (4) recorded and rehearsed the if-then plan; and (5) provided positive feedback about the plan.                                                                                                                                                                                                                                                  |                                                                                                                                                                                                                                                                                | pregnancy testing, 53% in the intervention group (23/43) made a positive change and visited at FU for supplies only, compared with 28% in the control group (13/45); statistical testing comparing intervention vs control groups not conducted                                                                                                         | Recruitment rate from study from which control group originated low (47%)<br><br>Comparability of intervention and control groups unknown<br><br>Statistical testing of comparisons of interest not conducted                                                            |
|                                                                                                                     |                                                                                                                                                                                                    | Exclusions: those seeking termination, testing positive for pregnancy, and attending the clinic after sexual assault                                                 | Single session                                                                                                                                                                                                                                                                                                                                                                                                    |                                                                                                                                                                                                                                                                                |                                                                                                                                                                                                                                                                                                                                                         |                                                                                                                                                                                                                                                                          |
|                                                                                                                     |                                                                                                                                                                                                    | Recruitment: 19 clinicians trained in the intervention approached potential participants at clinic                                                                   |                                                                                                                                                                                                                                                                                                                                                                                                                   |                                                                                                                                                                                                                                                                                |                                                                                                                                                                                                                                                                                                                                                         |                                                                                                                                                                                                                                                                          |
| Berenson (2012) <sup>a</sup>                                                                                        | RCT; 3 study groups                                                                                                                                                                                | 1,155 low-income adolescents and young adults aged 16–24 years requesting OC (56% aged 16–19 years; 54% Hispanic, 19% black, 25% white, 2% other; 78% never married) | Group 1: Face-to-face behavioral counseling and education from an experienced research assistant trained in contraceptive counseling for ~45 minutes at baseline clinic visit; techniques based on health belief model. Included distribution of handouts; reviewing instructions verbally; helping patient develop a cue to improve adherence; discussing risk and impact of pregnancy if contraception not used | <u>Long-term:</u> decrease teen or UIP<br><br><u>Medium-term:</u> increase contraceptive use (condoms), increase correct use (OC adherence, defined as starting each pack on time and not missing any doses or correctly making up any pills missed), increase continuation of | Pregnancy rates did not differ by study group ( $p=0.22$ ):<br><ul style="list-style-type: none"> <li>Group 1: 63 (16.5%)</li> <li>Group 2: 52 (13.5%)</li> <li>Group 3: 48 (12.4%)</li> </ul> Based on Cox proportional HRs, no differences in pregnancy over 12 months of FU:<br>Group 1 vs 3 HR=1.39, $p>0.05$ ;<br>Group 2 vs 3 HR=1.07, $p>0.05$ . | Level I; high risk for bias<br><br><u>Strengths:</u><br>Multiple sites<br><br>Randomization scheme followed for allocation<br><br>Outcome assessors blinded<br><br>Sample size calculations conducted<br><br>Comparable study groups related to baseline characteristics |
| Maternal and Child Health Bureau, Health Resources and Services Administration and the Eunice Kennedy Shriver NICHD | 5 publicly funded RH clinics in Southeast Texas                                                                                                                                                    |                                                                                                                                                                      |                                                                                                                                                                                                                                                                                                                                                                                                                   |                                                                                                                                                                                                                                                                                |                                                                                                                                                                                                                                                                                                                                                         |                                                                                                                                                                                                                                                                          |
| U.S.                                                                                                                | All patients given oral and written instructions on OC use and a 4-month supply; patients instructed to initiate OCs within 7 days of starting net menstrual cycle; patients also given 24 condoms |                                                                                                                                                                      |                                                                                                                                                                                                                                                                                                                                                                                                                   |                                                                                                                                                                                                                                                                                |                                                                                                                                                                                                                                                                                                                                                         |                                                                                                                                                                                                                                                                          |

**Appendix**  
**Contraceptive Counseling in Clinical Settings: An Updated Systematic Review**  
**Zapata et al.**

|                                         |                                                                                   |                                                                                                                                                                                                                                                                                                         |                               |                                                                                                                                                                                                                                                                                                                                                            |                                                                                                               |
|-----------------------------------------|-----------------------------------------------------------------------------------|---------------------------------------------------------------------------------------------------------------------------------------------------------------------------------------------------------------------------------------------------------------------------------------------------------|-------------------------------|------------------------------------------------------------------------------------------------------------------------------------------------------------------------------------------------------------------------------------------------------------------------------------------------------------------------------------------------------------|---------------------------------------------------------------------------------------------------------------|
| FU=3, 6, 12 months via phone interviews | participants approached at clinic (1,155/1,638 eligible patients recruited [71%]) | correctly, noncontraceptive benefits of OC, how to deal with common side effects, and STIs and need for condom use; and practicing condom application using a plastic model and discussing condom negotiation skills.                                                                                   | use, increase dual-method use | Condom use at last sexual intercourse did not differ by study group at 3, 6, or 12 months ( $p>0.05$ ). Condom use for groups 1, 2 and 3 was 8% at 12 months. Using GEE and adjusting for age, race/ethnicity, and FU visit, women in Group 2 were more likely to report condom use at last sexual intercourse than those in Group 3 (OR=1.32, $p<0.05$ ). | Standardization of counseling techniques tested by audio recordings                                           |
|                                         |                                                                                   | Group 2: Same as group 1 followed by monthly phone calls for 6 months (phone calls made weekly after initial visit until OC initiation). During calls, counselor reviewed how to use OC correctly, what to do when doses were missed, strategies to address side effects, and importance of condom use. |                               | Mean number of correctly used pill packs did not differ by study group ( $p=0.06$ ).                                                                                                                                                                                                                                                                       | Pregnancy rates documented via medical record review                                                          |
|                                         |                                                                                   | Group 3: SOC from a nurse provider who followed a written protocol                                                                                                                                                                                                                                      |                               | <ul style="list-style-type: none"> <li>• Group 1: 5.3</li> <li>• Group 2: 5.9</li> <li>• Group 3: 5.2</li> </ul>                                                                                                                                                                                                                                           | Pill packs used to verify correct use                                                                         |
|                                         |                                                                                   | Variable frequency: monthly phone calls for 6 months for Group 2                                                                                                                                                                                                                                        |                               | OC continuation did not differ by study group at 3, 6, or 12 months ( $p>0.05$ ). OC continuation for groups 1, 2, and 3 was 18%, 20%, and 20%, respectively, at 12 months.                                                                                                                                                                                | Intent to treat analysis                                                                                      |
|                                         |                                                                                   |                                                                                                                                                                                                                                                                                                         |                               |                                                                                                                                                                                                                                                                                                                                                            | FU time $\geq 1$ year                                                                                         |
|                                         |                                                                                   |                                                                                                                                                                                                                                                                                                         |                               |                                                                                                                                                                                                                                                                                                                                                            | <u>Weaknesses:</u><br>Blinding of participants and counselors NR                                              |
|                                         |                                                                                   |                                                                                                                                                                                                                                                                                                         |                               |                                                                                                                                                                                                                                                                                                                                                            | Allocation concealment NR                                                                                     |
|                                         |                                                                                   |                                                                                                                                                                                                                                                                                                         |                               |                                                                                                                                                                                                                                                                                                                                                            | Participants differed from non-participants by age and race/ethnicity                                         |
|                                         |                                                                                   |                                                                                                                                                                                                                                                                                                         |                               |                                                                                                                                                                                                                                                                                                                                                            | Outcomes largely assessed via self-report                                                                     |
|                                         |                                                                                   |                                                                                                                                                                                                                                                                                                         |                               |                                                                                                                                                                                                                                                                                                                                                            | Intervention completion rate not reported (e.g., unknown how many phone calls per participant were completed) |

**Appendix**  
**Contraceptive Counseling in Clinical Settings: An Updated Systematic Review**  
**Zapata et al.**

|                             |                                                                                                                                              |                                                                                                                                        |                                                                                                                                                                                                                                                                                                                                                                                                                                                                                  |                                                                                                                                                                                      |                                                                                                                                                                                                                  |                                                                                                                                                                                                                                                                                                                                                                                     |
|-----------------------------|----------------------------------------------------------------------------------------------------------------------------------------------|----------------------------------------------------------------------------------------------------------------------------------------|----------------------------------------------------------------------------------------------------------------------------------------------------------------------------------------------------------------------------------------------------------------------------------------------------------------------------------------------------------------------------------------------------------------------------------------------------------------------------------|--------------------------------------------------------------------------------------------------------------------------------------------------------------------------------------|------------------------------------------------------------------------------------------------------------------------------------------------------------------------------------------------------------------|-------------------------------------------------------------------------------------------------------------------------------------------------------------------------------------------------------------------------------------------------------------------------------------------------------------------------------------------------------------------------------------|
|                             |                                                                                                                                              |                                                                                                                                        |                                                                                                                                                                                                                                                                                                                                                                                                                                                                                  |                                                                                                                                                                                      | Dual-method use did not differ by study group at 3, 6, or 12 months ( $p>0.05$ ). Dual-method use for groups 1, 2 and 3 was 5%, 5%, and 6%, respectively, at 12 months.                                          | High attrition (44% lost to FU)                                                                                                                                                                                                                                                                                                                                                     |
| Redding (2015) <sup>a</sup> | RCT; 2 study groups                                                                                                                          | 828 non-pregnant adolescents aged 14–17 years                                                                                          | Trans-theoretical model (TTM)-tailored intervention to increase condom use and decrease smoking concurrently.                                                                                                                                                                                                                                                                                                                                                                    | <u>Medium-term:</u> increase correct use (consistent condoms use, defined as using condoms during every sex occasion in the past month or past 3 months if no sex in the past month) | Consistent condom use was significantly ( $p$ -value NR) higher in the intervention vs control group at 6 months (61% vs 46%) and 12 months (51.1% vs 39.0%), but not 18 months                                  | Level I; moderate risk for bias                                                                                                                                                                                                                                                                                                                                                     |
| NCI, NIH U.S.               | 4 urban Title X-funded family planning clinics (2 in large inner-city teaching hospitals; 2 in community-based health centers), Pennsylvania | Intervention group: n=424 (83% African American; 9% Latina; 95% sexually experienced; 62% never pregnant)                              | Participants completed modular programs; printed reports for participants and counselors provided TTM-tailored feedback. TTM counselors provided stage-targeted counseling designed to accelerate stage progress among those in early stages of change, prevent relapse among those further along, and facilitate effective recycling through stages if participants relapsed. Sessions were client-centered, personalized, and integrated motivational interviewing techniques. |                                                                                                                                                                                      | Among consistent condom users at baseline (n=334), significantly ( $p<0.05$ ) less relapse was found in the intervention vs control group at 6 months (22% vs 43%) and 12 months (46% vs 54%), but not 18 months | <u>Strengths:</u><br>Multiple sites<br>Computer-based randomization<br>Counselors received training on TTM and a protocol with stage-matched counseling activities<br>Quality assurance conducted to assess intervention fidelity<br>Study groups comparable related to baseline characteristics<br>Similar retention rate among study groups at 12 months<br>FU time $\geq 1$ year |
|                             | Standard family planning medical care provided to all participants after counseling                                                          | Control group: n=404 (85% African American; 6% Latina; 97% sexually experienced; 58% never pregnant) received SOC education and advice |                                                                                                                                                                                                                                                                                                                                                                                                                                                                                  |                                                                                                                                                                                      | Among non-consistent condom users at baseline                                                                                                                                                                    |                                                                                                                                                                                                                                                                                                                                                                                     |
|                             | FU=telephone surveys implemented at 12 and 18 months                                                                                         | Consistent condom use at                                                                                                               |                                                                                                                                                                                                                                                                                                                                                                                                                                                                                  |                                                                                                                                                                                      |                                                                                                                                                                                                                  |                                                                                                                                                                                                                                                                                                                                                                                     |

**Appendix**  
**Contraceptive Counseling in Clinical Settings: An Updated Systematic Review**  
**Zapata et al.**

|                                                                                                                                                                                                                                                           |                                                                                                                                                                                               |                                                                                                                                                                              |                                                                                                                                                                                                                                                                                                                                                                                                |
|-----------------------------------------------------------------------------------------------------------------------------------------------------------------------------------------------------------------------------------------------------------|-----------------------------------------------------------------------------------------------------------------------------------------------------------------------------------------------|------------------------------------------------------------------------------------------------------------------------------------------------------------------------------|------------------------------------------------------------------------------------------------------------------------------------------------------------------------------------------------------------------------------------------------------------------------------------------------------------------------------------------------------------------------------------------------|
| <p>baseline was 40.3% among both groups</p> <p>Recruitment: Upon registration at each clinic's reception desk, potential participants were recruited by a receptionist or health educator, recruitment occurred over 12 months (75% recruitment rate)</p> | <p>Variable frequency: out of 4 possible sessions (index visit, 3, 6, and 9 months), 75% of participants completed at least 2, 66% completed at least 3, and 34% completed all 4 sessions</p> | <p>(n=494), consistent condom use ranged from 42%–46% over 18 months among intervention group participants vs 34%–39% among control group participants (significance NR)</p> | <p><u>Weaknesses:</u><br/>           Blinding NR</p> <p>Sample size about half of projected need based on power calculations</p> <p>Condom use based on self-report</p> <p>Retention rate 64% at 12 months and 60% at 18 months</p> <p>Significantly higher retention rate among intervention vs control participants at 18 months</p> <p>Analyses not restricted to sexually active youth</p> |
|-----------------------------------------------------------------------------------------------------------------------------------------------------------------------------------------------------------------------------------------------------------|-----------------------------------------------------------------------------------------------------------------------------------------------------------------------------------------------|------------------------------------------------------------------------------------------------------------------------------------------------------------------------------|------------------------------------------------------------------------------------------------------------------------------------------------------------------------------------------------------------------------------------------------------------------------------------------------------------------------------------------------------------------------------------------------|

<sup>a</sup>Newly identified evidence since 2015 review.

CT, prospective nonrandomized controlled trial; DMPA, depot medroxyprogesterone acetate; EC, emergency contraception; FP, family planning; FU, follow-up; GEE, generalized estimating equations; HS, high school; LARC, long-acting reversible contraception (intrauterine device or implant); NCI, National Cancer Institute; NICHD, National Institute on Child Health and Human Development; HR, hazard ratio; NP, nurse practitioner; NR, not reported; NS, not significant; NYC, New York City; NH, non-Hispanic; OB/GYN, obstetrics and gynecology; OC, oral contraceptive; PA, physician assistant; RH, reproductive health; SOC, standard of care; STI, sexually transmitted infection; TTM, trans-theoretical model; UIP, unintended pregnancy; UK, United Kingdom.

**Appendix**  
**Contraceptive Counseling in Clinical Settings: An Updated Systematic Review**  
**Zapata et al.**

**Appendix Table 4.** Evidence on Impact of Contraceptive Counseling in Clinical Settings for Adults or Mixed Populations<sup>a</sup>

| Reference/<br>Funding                                 | Design/<br>Setting                                                    | Population                                                                                                                                                                                                                                    | Intervention                                                                                                                                                                                                                                                         | Outcomes                                                                                                                | Results                                                                                                                                                                                                                                                                                                                                                                                                                                                                                                         | Quality                                                                                                                                                                                                                                                                                                                                                                                                                                                                                                    |
|-------------------------------------------------------|-----------------------------------------------------------------------|-----------------------------------------------------------------------------------------------------------------------------------------------------------------------------------------------------------------------------------------------|----------------------------------------------------------------------------------------------------------------------------------------------------------------------------------------------------------------------------------------------------------------------|-------------------------------------------------------------------------------------------------------------------------|-----------------------------------------------------------------------------------------------------------------------------------------------------------------------------------------------------------------------------------------------------------------------------------------------------------------------------------------------------------------------------------------------------------------------------------------------------------------------------------------------------------------|------------------------------------------------------------------------------------------------------------------------------------------------------------------------------------------------------------------------------------------------------------------------------------------------------------------------------------------------------------------------------------------------------------------------------------------------------------------------------------------------------------|
| Custo (1987)<br><br>Funding source<br>NR<br><br>Italy | RCT; 2 study<br>groups<br><br>Study clinics<br><br>FU=12–15<br>months | 200 females aged<br>16–41 years (n=100<br>in intervention<br>group; n=100<br>control group who<br>received SOC);<br>other characteristics<br>NR<br><br>Recruitment:<br>females attending<br>study clinics for<br>contraceptive<br>information | Use of provider tool,<br>Adjusted Contraceptive<br>Score, after standard of<br>care counseling; tool<br>intended to help women<br>select the most<br>appropriate<br>contraceptive method<br>and increase<br>satisfaction with chosen<br>method<br><br>Single session | <u>Long-term:</u><br>decrease teen or<br>UIP<br><br><u>Medium-term:</u><br>increase use of<br>more effective<br>methods | Intervention group had<br>lower pregnancy rate<br>(4%) vs control group<br>(11%), but ns<br><br>Diaphragm use (most<br>effective contraceptive<br>method examined)<br>significantly ( $p<0.05$ )<br>increased among<br>intervention<br>participants from<br>baseline (9%) to FU<br>(26%); no differences<br>among controls (11%<br>vs 16%, respectively);<br>diaphragm use<br>significantly ( $p<0.05$ )<br>higher among<br>intervention<br>participants at FU<br>(26%) than intervention<br>participants (16%) | Level I; moderate<br>risk for bias<br><br><u>Strengths:</u><br>Used standard<br>provider tool<br><br>Comparable study<br>groups related to<br>age, RH history and<br>economic<br>background<br><br>FU rate $\leq 15\%$<br>different between<br>groups (95% for<br>intervention and<br>92% for control<br>group)<br><br>FU time $\geq 1$ year<br><br><u>Weaknesses:</u><br>Recall bias<br><br>Recruitment rate<br>NR<br><br>Lack of blinding<br><br>Allocation<br>procedures<br>including<br>concealment NR |
| Namerow<br>(1989)                                     | CT; 2 study<br>groups                                                 | 823 females aged<br>$\leq 17$ – $\geq 23$ years<br>(n=412 in                                                                                                                                                                                  | Contingency planning<br>counseling program<br>with 5 components—                                                                                                                                                                                                     | <u>Long-term:</u><br>decrease teen or                                                                                   | No significant<br>difference between<br>intervention and control                                                                                                                                                                                                                                                                                                                                                                                                                                                | Level II-1; high risk<br>for bias                                                                                                                                                                                                                                                                                                                                                                                                                                                                          |

**Appendix**  
**Contraceptive Counseling in Clinical Settings: An Updated Systematic Review**  
**Zapata et al.**

|                                          |                                                   |                                                                                                                                                                                                                               |                                                                                                                                                                                                                                                                                                                                                                                                                                                                                                                                                                                                                                                                                                                                                                                                            |                                                                                                      |                                                                                                                                                                                                                                                                                                                                                                                                                                                                                                                                                                                                                                                                                                                                                                                                                               |                                                                                                                                                                                                                                                                                                                                                                                          |
|------------------------------------------|---------------------------------------------------|-------------------------------------------------------------------------------------------------------------------------------------------------------------------------------------------------------------------------------|------------------------------------------------------------------------------------------------------------------------------------------------------------------------------------------------------------------------------------------------------------------------------------------------------------------------------------------------------------------------------------------------------------------------------------------------------------------------------------------------------------------------------------------------------------------------------------------------------------------------------------------------------------------------------------------------------------------------------------------------------------------------------------------------------------|------------------------------------------------------------------------------------------------------|-------------------------------------------------------------------------------------------------------------------------------------------------------------------------------------------------------------------------------------------------------------------------------------------------------------------------------------------------------------------------------------------------------------------------------------------------------------------------------------------------------------------------------------------------------------------------------------------------------------------------------------------------------------------------------------------------------------------------------------------------------------------------------------------------------------------------------|------------------------------------------------------------------------------------------------------------------------------------------------------------------------------------------------------------------------------------------------------------------------------------------------------------------------------------------------------------------------------------------|
| Office of Population Affairs<br><br>U.S. | Hospital-based FP clinic, NYC<br><br>FU=12 months | intervention group; n=411 in control group who received SOC); 50% Latina; 41% African American; 56% HS graduates; 48% Medicaid<br><br>Enrolled: n=914<br><br>Recruitment: FP patients deemed in need of individual counseling | participant asked to articulate a pregnancy goal; participant's perceived probability of pregnancy is determined; specific method selected, the length of time for which it would be used, and what the participant would need to do to use it effectively specified; contingencies that might arise subsequently and interfere with correct use; and detailed plans for dealing with each contingency outlined<br><br>Program also included opportunities to: specify in writing when patient would next have contact with counselor or make a clinic visit; what would be done if an appointment could not be kept; and how the counselor and clinic could help participant practice effective contraception<br><br>Participant received written copy of Pregnancy Prevention Plan<br><br>Single session | unintended pregnancy<br><br><u>Medium-term:</u> increase correct use, increase repeat/FU service use | groups in UIP rates at 6 and 12 months FU (~7% became pregnant in each group by 6 months, ~15% by 12 months); among previously pregnant females, those in intervention group had significantly ( $p<0.05$ ) decreased odds (50%) of experiencing UIP within 6 months vs those in control group; by 12 months, differences disappeared<br><br>Among OC users (n=319), those in intervention vs control group reported significantly ( $p<0.05$ ) higher correct use (i.e., taking pills every day) (53% vs 43%); among OC users that had missed pills (n=166), those in intervention vs control group reported significantly ( $p<0.01$ ) more women taking the forgotten pills appropriately (89% vs 68%)<br><br>No difference in clinic attendance between the intervention and control groups was observed (percentages NR) | <u>Strengths:</u><br>High participation (90%)<br><br>Comparable study groups related to age, ethnicity, education, marital status, Medicaid status, and past pregnancy<br><br>FU time $\geq 1$ year<br><br>FU rate $\leq 15\%$ different for groups (73% for both groups)<br><br><u>Weaknesses:</u><br>High attrition<br><br>Recall bias<br><br>Self-report bias<br><br>Lack of blinding |
|------------------------------------------|---------------------------------------------------|-------------------------------------------------------------------------------------------------------------------------------------------------------------------------------------------------------------------------------|------------------------------------------------------------------------------------------------------------------------------------------------------------------------------------------------------------------------------------------------------------------------------------------------------------------------------------------------------------------------------------------------------------------------------------------------------------------------------------------------------------------------------------------------------------------------------------------------------------------------------------------------------------------------------------------------------------------------------------------------------------------------------------------------------------|------------------------------------------------------------------------------------------------------|-------------------------------------------------------------------------------------------------------------------------------------------------------------------------------------------------------------------------------------------------------------------------------------------------------------------------------------------------------------------------------------------------------------------------------------------------------------------------------------------------------------------------------------------------------------------------------------------------------------------------------------------------------------------------------------------------------------------------------------------------------------------------------------------------------------------------------|------------------------------------------------------------------------------------------------------------------------------------------------------------------------------------------------------------------------------------------------------------------------------------------------------------------------------------------------------------------------------------------|



**Appendix**  
**Contraceptive Counseling in Clinical Settings: An Updated Systematic Review**  
**Zapata et al.**

|                                                                                       |                                                                                                                                                                       |                                                                                                                                                                                                                                                  |                                                                                                                                                                                                              |                                                                                                                                                                                                                                                     |                                                                                                                                                                                                                                                                                                                                                 |                                                                                                                                                                                                                                                                                                                                           |
|---------------------------------------------------------------------------------------|-----------------------------------------------------------------------------------------------------------------------------------------------------------------------|--------------------------------------------------------------------------------------------------------------------------------------------------------------------------------------------------------------------------------------------------|--------------------------------------------------------------------------------------------------------------------------------------------------------------------------------------------------------------|-----------------------------------------------------------------------------------------------------------------------------------------------------------------------------------------------------------------------------------------------------|-------------------------------------------------------------------------------------------------------------------------------------------------------------------------------------------------------------------------------------------------------------------------------------------------------------------------------------------------|-------------------------------------------------------------------------------------------------------------------------------------------------------------------------------------------------------------------------------------------------------------------------------------------------------------------------------------------|
| <p>Todres (1990)</p> <p>Funding source<br/>NR</p> <p>Canada</p>                       | <p>Pre-post study; 1 study group</p> <p>Planned Parenthood clinic, Toronto</p> <p>FU=None</p>                                                                         | <p>62 females aged 14–35 years (mean age=19 years); other characteristics NR</p> <p>Recruitment: questionnaire given to participant with intake forms at admission</p>                                                                           | <p>Counseling delivered by public health staff versus nonpaid lay volunteers; details of counseling NR</p> <p>Single session</p>                                                                             | <p><u>Short-term:</u> increase knowledge</p>                                                                                                                                                                                                        | <p>Overall, women had significantly (<math>p&lt;0.01</math>) higher knowledge scores after counseling</p> <p>Both types of counselors produced significant changes in knowledge levels (public health staff, <math>p&lt;0.05</math> and lay counselors, <math>p&lt;0.20</math>)</p>                                                             | <p>Level II-3; high risk for bias</p> <p><u>Weaknesses:</u><br/>Participation rate NR</p> <p>Small sample</p> <p>Characteristics of completers and noncompleters not examined</p> <p>Validity of instrument questionable</p> <p>Considered <math>p&lt;0.20</math> as statistically significant</p> <p>No behavioral outcomes examined</p> |
| <p>Weisman (2002)</p> <p>CDC, Association of Schools of Public Health</p> <p>U.S.</p> | <p>Cohort analysis of cross-sectional survey data</p> <p>16 county commercial provider network (nonprofit managed care company founded by University of Michigan)</p> | <p>898 females aged 18–44 years; 83% white, NH, at risk for UIP; at risk for UIP group: mean age=33 years, 30% completed graduate school</p> <p>Eligible: n=1,406</p> <p>Recruitment: random sample selected from provider network enrollees</p> | <p>Contraceptive counseling provided in the past 2 years by providers in managed care plans (HMO or POS); counseling evaluated on 3 dimensions—exposure, content and personalization</p> <p>Frequency NR</p> | <p><u>Medium-term:</u> increase contraceptive use</p> <p><u>Short-term:</u> increase intentions to use contraception, enhance other psychosocial determinants of contraceptive use</p> <p><u>Client experiences:</u> satisfaction with services</p> | <p>Among women at risk of UIP, receiving personalized counseling plus information was significantly (<math>p&lt;0.05</math>) associated with increased odds of current contraceptive use (OR=4.97), and intentions to use contraception next year (OR=2.74) vs those receiving no counseling</p> <p>Among all women, receiving personalized</p> | <p>Level II-2; high risk for bias</p> <p><u>Strengths:</u><br/>Analysis adjusted for confounding variables</p> <p><u>Weaknesses:</u><br/>≤65% recruitment rate</p> <p>Recall bias</p>                                                                                                                                                     |

**Appendix**  
**Contraceptive Counseling in Clinical Settings: An Updated Systematic Review**  
**Zapata et al.**

|                             |                                                                       |                                                                                                                                                                                                                                                                                           |                                                                                                                                                                                                                                                                                                                                                                                                                                                                                                                                                                                                                                                           |                                                                       |                                                                                                                                                                                                                                                                    |                                                                                                                                                                                                                                                                                                                                      |
|-----------------------------|-----------------------------------------------------------------------|-------------------------------------------------------------------------------------------------------------------------------------------------------------------------------------------------------------------------------------------------------------------------------------------|-----------------------------------------------------------------------------------------------------------------------------------------------------------------------------------------------------------------------------------------------------------------------------------------------------------------------------------------------------------------------------------------------------------------------------------------------------------------------------------------------------------------------------------------------------------------------------------------------------------------------------------------------------------|-----------------------------------------------------------------------|--------------------------------------------------------------------------------------------------------------------------------------------------------------------------------------------------------------------------------------------------------------------|--------------------------------------------------------------------------------------------------------------------------------------------------------------------------------------------------------------------------------------------------------------------------------------------------------------------------------------|
|                             |                                                                       | FU: None                                                                                                                                                                                                                                                                                  |                                                                                                                                                                                                                                                                                                                                                                                                                                                                                                                                                                                                                                                           |                                                                       | counseling plus information was significantly ( $p<0.05$ ) associated with increased odds of satisfaction (OR=3.07) vs those receiving no counseling; it was not significantly associated with self-efficacy to prevent UIP                                        | Validity of instrument questionable                                                                                                                                                                                                                                                                                                  |
| Boise (2003)<br>CDC<br>U.S. | Pre-post study; 1 study group<br><br>Medical office<br><br>FU=1 month | 85 females aged 18–44 years (mean age=25 years); 38% Latina, 27% African American; 75% college educated; 69% cohabitating; 30% considered high risk for STI/HIV<br><br>Recruitment: females seeking pregnancy test from medical office were requested to fill out screening questionnaire | Brief individually tailored motivational counseling based on participant responses to risk assessment; variety of contraceptive choices discussed; readiness to use chosen method scored; barriers and aspects of motivation explored; counselor and participant negotiated risk-reduction steps for client to decrease risk of UIP and STI/HIV; methods provided directly or via referrals; FU offered and counselor made “booster” call to participant 2 weeks after initial session to review risk-reduction steps, identify barriers to completing steps and help overcoming those barriers<br><br>Frequency: initial plus FU contact 2–4 weeks later | <u>Medium-term</u> : increase contraceptive use, increase correct use | From baseline to 1 month FU (among completers), any contraceptive use increased from 74% to 91%, consistent condom use (among condom users) increased from 18% to 87%, and consistent OC use (among OC users) increased from 48% to 100%; tests of significance NR | Level II-3; high risk for bias<br><br><u>Strengths</u> : Providers received training on protocol<br><br><u>Weaknesses</u> : Self-report bias<br><br>High attrition<br><br>Recall bias<br>Selection bias<br><br>Small sample<br><br><65% recruitment rate<br><br>Short FU time for behavioral outcomes<br><br>Test of significance NR |
| Shlay (2003)<br>NICHD       | RCT; 2 study groups                                                   | 877 females aged ~15–49 years; n=437 in                                                                                                                                                                                                                                                   | STI clinic-initiated enhanced contraceptive care followed by                                                                                                                                                                                                                                                                                                                                                                                                                                                                                                                                                                                              | <u>Long-term</u> : decrease teen or                                   | At 12 months FU, no significant differences between intervention and control groups in                                                                                                                                                                             | Level 1; moderate risk for bias                                                                                                                                                                                                                                                                                                      |

**Appendix**  
**Contraceptive Counseling in Clinical Settings: An Updated Systematic Review**  
**Zapata et al.**

|               |                                                                 |                                                                                                                                                                                                                                                                                                                           |                                                                                                                                                                                                                                                                                                                                                                                                                                                           |                                                                                                                                                  |                                                                                                                                                                                                                                                                                                                                                                                                                                                                                                                                                                                                                                           |                                                                                                                                                                                                                                                                                                                                                                                                                                                                    |
|---------------|-----------------------------------------------------------------|---------------------------------------------------------------------------------------------------------------------------------------------------------------------------------------------------------------------------------------------------------------------------------------------------------------------------|-----------------------------------------------------------------------------------------------------------------------------------------------------------------------------------------------------------------------------------------------------------------------------------------------------------------------------------------------------------------------------------------------------------------------------------------------------------|--------------------------------------------------------------------------------------------------------------------------------------------------|-------------------------------------------------------------------------------------------------------------------------------------------------------------------------------------------------------------------------------------------------------------------------------------------------------------------------------------------------------------------------------------------------------------------------------------------------------------------------------------------------------------------------------------------------------------------------------------------------------------------------------------------|--------------------------------------------------------------------------------------------------------------------------------------------------------------------------------------------------------------------------------------------------------------------------------------------------------------------------------------------------------------------------------------------------------------------------------------------------------------------|
| U.S.          | STI clinic operated by Denver Public Health<br><br>FU=12 months | intervention group; n=440 in control group; both groups received condoms with spermicide and a referral list of PCPs for ongoing RH care; 30% Latina; 25% African American; 61% no healthcare insurance<br><br>Eligible: n=1,909<br><br>Total available for FU: n=794<br><br>Recruitment: invited by staff to participate | facilitated referral to a PCP to establish relationship, improve contraceptive adherence, and decrease UIP; care included individual medical screening, individual counseling about all potential methods available at the clinic, and methods available through a PCP; participants had method of choice initiated in clinic at enrollment or early FU visit; multiple client contacts to facilitate PCP referral for ongoing care<br><br>Single session | unintended pregnancy<br><br><u>Medium-term:</u> increase use of more effective methods, increase repeat/FU service use, increase dual-method use | pregnancy rates (24% vs 28%)<br><br>Significantly ( $p<0.0001$ ) more intervention than control women reported use of effective contraceptives at 4 months (50% vs 22%) and 8 months (44% and 26%) FU; however, differences were ns by 12 months FU<br><br>No significant differences between intervention and control participants in FU service use at 4, 8, or 12 month FU (68% vs 69%, 69% vs 65%, and 72% vs 72%, respectively)<br><br>Significantly $p<0.01$ more intervention than control women reported dual protection use at 4 months (29% vs 14%) and 8 months (23% and 14%) FU; however, differences were ns by 12 months FU | <u>Strengths:</u><br>High completion rate (91%)<br><br>Comparable study groups related to background characteristics<br><br>FU time $\geq 1$ year<br><br><u>Weaknesses:</u><br>$\leq 65\%$ recruitment rate<br><br>Reliance on birth registry for individuals lost to FU limited information available<br><br>Recall bias<br><br>Blinding NR<br><br>Allocation procedures including concealment NR<br><br>May not represent general FP clients (STI clinic sample) |
| Bender (2004) | RCT; 2 study groups                                             | 276 females aged 19–46 years requesting pregnancy termination (n=148 in intervention                                                                                                                                                                                                                                      | Intensive pretermination contraceptive counseling; included plotting contraceptive history to focus past,                                                                                                                                                                                                                                                                                                                                                 | <u>Medium-term:</u> increase contraceptive use, increase use of more effective methods                                                           | No significant difference in the proportions of women in intervention and control groups who initiated post-abortion                                                                                                                                                                                                                                                                                                                                                                                                                                                                                                                      | Level I; moderate risk for bias<br><br><u>Strengths:</u><br>FU rate $\leq 15\%$ different between                                                                                                                                                                                                                                                                                                                                                                  |

**Appendix**  
**Contraceptive Counseling in Clinical Settings: An Updated Systematic Review**  
**Zapata et al.**

|                                                                       |                                                                                                                                                                                        |                                                                                                                                                          |                                                                                                                                                                                                                                         |                                                                                                                                                                                                                                                                                                                                                                                                                                                                                |                                                                                                                                      |                                                                             |
|-----------------------------------------------------------------------|----------------------------------------------------------------------------------------------------------------------------------------------------------------------------------------|----------------------------------------------------------------------------------------------------------------------------------------------------------|-----------------------------------------------------------------------------------------------------------------------------------------------------------------------------------------------------------------------------------------|--------------------------------------------------------------------------------------------------------------------------------------------------------------------------------------------------------------------------------------------------------------------------------------------------------------------------------------------------------------------------------------------------------------------------------------------------------------------------------|--------------------------------------------------------------------------------------------------------------------------------------|-----------------------------------------------------------------------------|
| FU=4–6 months post-abortion                                           | group; n=128 in control group who received contraceptive information only); most (60%) completed primary education<br><br>Recruitment: Individual contact at abortion scheduling visit | present, and future contraceptive use information together to raise participant awareness towards contraception<br><br>Frequency: 2 contacts in 6 months | contraceptive use (86.5% vs 85.2%, respectively)<br><br>No differences in the uptake of more effective methods; OCs were chosen by 61% and 58% of intervention and control group women; injectables chosen by 12% and 11%, respectively | groups (70% for intervention and 61% for control groups)<br><br>Women were blinded as to study group assignment<br><br>Randomization assignment made using random numbers table<br><br><u>Weaknesses:</u><br>Significant background differences between groups (age, childbearing, abortion history, education) may have biased results<br><br>Recall bias<br><br>Self-report bias<br><br>May not represent FP clients (post-abortion sample)<br><br>Allocation concealment NR |                                                                                                                                      |                                                                             |
| Gilliam (2004)<br><br>ACOG/Park-Davis Research Award in Contraception | RCT; 2 study groups<br><br>Resident run clinic serving low-income                                                                                                                      | 33 unmarried females aged 15–25 years with UIP who expressed intention to use OCs postpartum (n=18 in                                                    | Theory-based, multimedia, postpartum educational intervention and individual counseling prior to hospital discharge;                                                                                                                    | <u>Long-term:</u> decrease teen or unintended pregnancy                                                                                                                                                                                                                                                                                                                                                                                                                        | At 1 year, no significant differences between intervention and control groups in repeat pregnancy rates (12% vs 8%, respectively) or | Level I; moderate risk for bias<br><br><u>Strengths:</u><br>FU time ≥1 year |

**Appendix**  
**Contraceptive Counseling in Clinical Settings: An Updated Systematic Review**  
**Zapata et al.**

|                                           |                                                                |                                                                                                                                                                                                                                                                                                          |                                                                                                                                                                                                                                                                                                      |                                                                                               |                                                                                                                                                                                                |                                                                                                                                                                                                                                                                                                                                                                                                           |
|-------------------------------------------|----------------------------------------------------------------|----------------------------------------------------------------------------------------------------------------------------------------------------------------------------------------------------------------------------------------------------------------------------------------------------------|------------------------------------------------------------------------------------------------------------------------------------------------------------------------------------------------------------------------------------------------------------------------------------------------------|-----------------------------------------------------------------------------------------------|------------------------------------------------------------------------------------------------------------------------------------------------------------------------------------------------|-----------------------------------------------------------------------------------------------------------------------------------------------------------------------------------------------------------------------------------------------------------------------------------------------------------------------------------------------------------------------------------------------------------|
| U.S                                       | women receiving public assistance<br><br>FU=12 months          | intervention group; n=15 in control group who received SOC); 100% African American; 37% college-educated; 75% unemployed<br><br>Enrolled: n=43 12 month FU: n=25 (n=16 in intervention group and n=9 in control group)<br><br>Recruitment: received informational flyer at time of first visit to clinic | counseling emphasized self-efficacy, what to do if a dose is missed, backup contraceptive methods, contact telephone numbers, and when to contact a nurse or physician; all written material was reviewed in detail; videotape based on principles of self-efficacy was viewed<br><br>Single session | <u>Medium-term:</u> increase continuation of use<br><br><u>Short-term:</u> increase knowledge | continued use of OCs (16% vs 12%, respectively)<br><br>Among the participants with complete data at 12 months (n=14), a significant positive change in knowledge was observed vs control group | Research team members blinded to group assignment<br><br>Randomization assignment made using random numbers table<br><br>Allocation concealed<br><br><u>Weaknesses:</u><br>Small sample<br><br>Self-report bias<br><br>High attrition<br><br>FU rate $\geq$ 15% different between groups (89% for intervention and 60% for control group)<br><br>May not represent general FP clients (postpartum sample) |
| Yassin (2005)                             | Cohort analysis of cross-sectional survey data; 2 study groups | 100 females aged 15-41 years (median age=26 years) received counseling; compared with 422 control group                                                                                                                                                                                                  | Dedicated and targeted pretermination of pregnancy counseling provided by experienced FP nurses; included full and detailed discussion of all methods of contraception,                                                                                                                              | Medium-term: increase contraceptive use, increase use of more effective methods               | More women in intervention group used some contraceptive method post-abortion (96%) than control group (40%); tests of significance not conducted                                              | Level II-2; high risk for bias<br><br><u>Strengths:</u><br>High participation and completion rates (100%)<br><br><u>Weaknesses:</u>                                                                                                                                                                                                                                                                       |
| Ford, W.T. Grant, and Hewlett Foundations | Surgical abortion clinic, Burnley, UK                          | women who received no counseling                                                                                                                                                                                                                                                                         |                                                                                                                                                                                                                                                                                                      |                                                                                               |                                                                                                                                                                                                |                                                                                                                                                                                                                                                                                                                                                                                                           |

**Appendix**  
**Contraceptive Counseling in Clinical Settings: An Updated Systematic Review**  
**Zapata et al.**

|                                 |                                                                 |                                                                                                                                                                                |                                                                                                                                                                                                                                                                                                                                                                                                                                   |                                                                                                                         |                                                                                                                                                                                                                                                                   |                                                                                                                                                                                                                                                                                 |
|---------------------------------|-----------------------------------------------------------------|--------------------------------------------------------------------------------------------------------------------------------------------------------------------------------|-----------------------------------------------------------------------------------------------------------------------------------------------------------------------------------------------------------------------------------------------------------------------------------------------------------------------------------------------------------------------------------------------------------------------------------|-------------------------------------------------------------------------------------------------------------------------|-------------------------------------------------------------------------------------------------------------------------------------------------------------------------------------------------------------------------------------------------------------------|---------------------------------------------------------------------------------------------------------------------------------------------------------------------------------------------------------------------------------------------------------------------------------|
|                                 | FU: NR                                                          | Completed assessment: 100                                                                                                                                                      | informational literature, opportunity to choose a method based on discussion and literature, administration of chosen method at time of abortion or immediately post-abortion; non-user-dependent methods were emphasized.                                                                                                                                                                                                        |                                                                                                                         | More women in intervention group used effective methods post-abortion than control group (implant: 11% vs 0%, IUD: 47% vs 0%); tests of significance not conducted                                                                                                | Comparability of groups related to background characteristics unknown (NR for comparison group)<br><br>Selection bias<br><br>Confounding possible<br><br>No tests of significance conducted<br><br>May not represent FP clients (post-abortion sample)                          |
| Proctor (2006)                  | RCT; 3 study groups                                             | 319 postpartum females, mean age 23.4 years; n=117 in video arm; n=101 in literature arm; n=101 in physician arm; 53% Latina; 36% African American; 42% less than HS education | Three different postpartum contraceptive counseling methods: (1) <u>video arm</u> , which is a video that gives overview of risks and benefits of each method; physician is available to answer questions, but prohibited from engaging in discussion; (2) <u>literature arm</u> , which is companion literature that directs counseling; physician is available to answer questions, but prohibited from engaging in discussion; | <u>Medium-term:</u> increase use of more effective methods<br><br><u>Client experiences:</u> satisfaction with services | No difference was identified in the contraceptive method chosen between the 3 arms<br><br>>90% of participants in each arm were satisfied with their counseling, with significantly ( $p<0.05$ ) higher levels of satisfaction in the physician-patient arm (99%) | Level I; high risk for bias<br><br><u>Strengths:</u> High completion rate (97% overall)<br><br>Comparable study groups related to age, race, parity, education, or mode of delivery<br><br>Randomization assignment made using random numbers table<br><br>Allocation concealed |
| Carolinas Healthcare Foundation | Urban medical center (Carolinas Medical Center, North Carolina) |                                                                                                                                                                                |                                                                                                                                                                                                                                                                                                                                                                                                                                   |                                                                                                                         |                                                                                                                                                                                                                                                                   |                                                                                                                                                                                                                                                                                 |
| U.S.                            | FU=8 months                                                     | Initially randomized: n=329                                                                                                                                                    |                                                                                                                                                                                                                                                                                                                                                                                                                                   |                                                                                                                         |                                                                                                                                                                                                                                                                   |                                                                                                                                                                                                                                                                                 |

**Appendix**  
**Contraceptive Counseling in Clinical Settings: An Updated Systematic Review**  
**Zapata et al.**

|                  |                     |                                                                                                      |                                                                                                                                                                                                                                                                                                                                                                                                                                                                 |                                                                                                                                                                                           |                                                                                                                                                                                                                                                                                                                                                                                                                             |                                                                                                                                                                                                                                                                                                                  |
|------------------|---------------------|------------------------------------------------------------------------------------------------------|-----------------------------------------------------------------------------------------------------------------------------------------------------------------------------------------------------------------------------------------------------------------------------------------------------------------------------------------------------------------------------------------------------------------------------------------------------------------|-------------------------------------------------------------------------------------------------------------------------------------------------------------------------------------------|-----------------------------------------------------------------------------------------------------------------------------------------------------------------------------------------------------------------------------------------------------------------------------------------------------------------------------------------------------------------------------------------------------------------------------|------------------------------------------------------------------------------------------------------------------------------------------------------------------------------------------------------------------------------------------------------------------------------------------------------------------|
|                  |                     |                                                                                                      | and (3) <u>physician-patient face-to-face session</u> , which included interaction that was not scripted or limited in any way.                                                                                                                                                                                                                                                                                                                                 |                                                                                                                                                                                           |                                                                                                                                                                                                                                                                                                                                                                                                                             | <u>Weaknesses:</u><br>Not all patients in the physician arm received same counseling                                                                                                                                                                                                                             |
|                  |                     |                                                                                                      | Single session                                                                                                                                                                                                                                                                                                                                                                                                                                                  |                                                                                                                                                                                           |                                                                                                                                                                                                                                                                                                                                                                                                                             | Recruitment rate<br>NR                                                                                                                                                                                                                                                                                           |
|                  |                     |                                                                                                      |                                                                                                                                                                                                                                                                                                                                                                                                                                                                 |                                                                                                                                                                                           |                                                                                                                                                                                                                                                                                                                                                                                                                             | Completion rate by study group<br>NR                                                                                                                                                                                                                                                                             |
|                  |                     |                                                                                                      |                                                                                                                                                                                                                                                                                                                                                                                                                                                                 |                                                                                                                                                                                           |                                                                                                                                                                                                                                                                                                                                                                                                                             | Blinding<br>NR                                                                                                                                                                                                                                                                                                   |
|                  |                     |                                                                                                      |                                                                                                                                                                                                                                                                                                                                                                                                                                                                 |                                                                                                                                                                                           |                                                                                                                                                                                                                                                                                                                                                                                                                             | May not represent general FP clients (postpartum sample)                                                                                                                                                                                                                                                         |
| Schunmann (2006) | RCT; 2 study groups | 613 females, mean age 24 years; n=316 in intervention group; n=297 in control group who received SOC | Brief individualized discussion of future contraception during initial consultation and assessment; post-abortion interview with physician and specialist trained in contraception to solicit details regarding demographics, full reproductive history, and contraceptive use at time of conception; preferred method of post-abortion contraceptive ascertained with 3 month supply of chosen method of dispensed if possible; if IUD was chosen, appointment | <u>Long-term:</u><br>decrease teen or unintended pregnancy<br><br><u>Medium-term:</u><br>increase contraceptive use, increase use of more effective methods, increase continuation of use | At 24 months FU, case note review found that 15% of intervention and 10% of control group women had at least 1 further UIP that resulted in termination (ns)<br><br>At 4 months FU, 88% of intervention and 89% of control group women were using contraception (ns); significantly ( $p<0.05$ ) more women in the intervention (37%) than control (26%) group were using a longer-acting method (IUD, implant, injectable) | Level I; moderate risk for bias<br><br><u>Strengths:</u><br>Comparable study groups related to age and deprivation (calculated from ZIP codes)<br><br>FU rate $\leq 15\%$ different for groups (63% for intervention and 60% for control group)<br><br>FU time $\geq 1$ year<br><br>Randomization assignment (of |

**Appendix**  
**Contraceptive Counseling in Clinical Settings: An Updated Systematic Review**  
**Zapata et al.**

|                           |                     |                                                                                                  |                                                                                                                                                                                                              |                                                                                                                                     |                                                                                                                                                                                                                                            |                                                                                                                                                                                                                                                                                                                                                                                                                 |
|---------------------------|---------------------|--------------------------------------------------------------------------------------------------|--------------------------------------------------------------------------------------------------------------------------------------------------------------------------------------------------------------|-------------------------------------------------------------------------------------------------------------------------------------|--------------------------------------------------------------------------------------------------------------------------------------------------------------------------------------------------------------------------------------------|-----------------------------------------------------------------------------------------------------------------------------------------------------------------------------------------------------------------------------------------------------------------------------------------------------------------------------------------------------------------------------------------------------------------|
|                           |                     | Recruitment: invited by staff to participate                                                     | with FP clinic arranged for insertion 2 weeks post-abortion; condoms and written information provided<br><br>Single session                                                                                  |                                                                                                                                     | At 4 months FU, continuation rates for intervention vs control women were 86% vs 80% for COCs, 64% vs 100% for POPs, 75% vs 100% for barrier methods, 66% vs 50% for IUD, 33% vs 20% for IUS, and 86% vs 69% for injectables (all were ns) | calendar weeks) made using random numbers table<br><br><u>Weaknesses:</u><br>≤65% recruitment rate<br><br>High attrition<br><br>Differences in background characteristic between completers and noncompleters related to parity, education, and past abortion)<br><br>Recording bias<br><br>Lack of blinding<br><br>Allocation not concealed<br><br>May not represent general FP clients (post-abortion sample) |
| Nobili (2007)             | RCT; 2 study groups | 43 females aged 18–44 years (n=21 in intervention group; n=22 in control group who received SOC) | Patient-centered contraceptive counseling; phase 1 included semi-structured interview that explored past and present contraceptive experiences, barriers to use, perceptions of risk and future plans; phase | <u>Medium-term:</u> increase use of more effective methods<br><br><u>Short-term:</u> increase knowledge, enhance other psychosocial | Intervention group demonstrated a significant ( $p<0.005$ ) increase in the use of effective methods between baseline (20%) and 1 and 3 months FU (65% and 80%, respectively); no changes in control                                       | Level I; moderate risk for bias<br><br><u>Strengths:</u><br>Research team members blinded to group assignment<br><br>Comparable study groups related to                                                                                                                                                                                                                                                         |
| Funding source not stated | University hospital |                                                                                                  |                                                                                                                                                                                                              |                                                                                                                                     |                                                                                                                                                                                                                                            |                                                                                                                                                                                                                                                                                                                                                                                                                 |
| Italy                     | FU=3 months         | Eligible: n=70<br>Completed FU:                                                                  |                                                                                                                                                                                                              |                                                                                                                                     |                                                                                                                                                                                                                                            |                                                                                                                                                                                                                                                                                                                                                                                                                 |



**Appendix**  
**Contraceptive Counseling in Clinical Settings: An Updated Systematic Review**  
**Zapata et al.**

|                 |                                                                                                          |                                                                                                                                                                                                                                              |                                                                                                                                    |                                                                                                                                                                                                                                                                                       |                                                                                                                                                                                                                                                                                                                                                 |                                                                                                                           |
|-----------------|----------------------------------------------------------------------------------------------------------|----------------------------------------------------------------------------------------------------------------------------------------------------------------------------------------------------------------------------------------------|------------------------------------------------------------------------------------------------------------------------------------|---------------------------------------------------------------------------------------------------------------------------------------------------------------------------------------------------------------------------------------------------------------------------------------|-------------------------------------------------------------------------------------------------------------------------------------------------------------------------------------------------------------------------------------------------------------------------------------------------------------------------------------------------|---------------------------------------------------------------------------------------------------------------------------|
|                 | n=20 in intervention group; n=21 in control group                                                        | 2 offered education; presented advantages and disadvantages of available methods and explanations on how to obtain and use each method; phase 3 involved choosing method and knowledge test; participant questions and doubts were addressed | determinants of contraceptive use                                                                                                  | group between baseline (19%) and FU were detected (32% and 38%, respectively)                                                                                                                                                                                                         | age, education, marital status, parity, and occupation                                                                                                                                                                                                                                                                                          |                                                                                                                           |
|                 | Recruitment: invited by staff to participate at time of visit to clinic to request pregnancy termination | Single session                                                                                                                                                                                                                               |                                                                                                                                    | At baseline there was no difference in knowledge or attitudes towards contraception; at 1 month FU, the intervention group demonstrated significant ( $p<0.0005$ ) increase in both knowledge and positive attitude toward contraception vs nonsignificant results from control group | High completion rate (95%)<br>FU rate $\leq 15\%$ different for groups (95% for both groups)<br><u>Weaknesses:</u><br>Low participation (61%)<br>Small sample size from control group<br>Short FU time for behavioral outcomes<br>Allocation procedures including concealment NR<br>May not represent general FP clients (post-abortion sample) |                                                                                                                           |
| Petersen (2007) | RCT; 2 study groups                                                                                      | 708 females aged 16–44 years (n=336 in intervention group; n=372 in control group who received general preventive health counseling (e.g.,                                                                                                   | Behavior-based contraceptive counseling using motivational interviewing techniques, including discussion of all available types of | <u>Long-term:</u> decrease teen or unintended pregnancy<br><u>Medium-term:</u> increase correct use                                                                                                                                                                                   | No significant difference in UIP between groups at 2, 8, or 12 months FU (percentages NR)<br>Among condom users, the proportion reporting                                                                                                                                                                                                       | Level I; moderate risk for bias<br><u>Strengths:</u><br>High participation rate (96% of eligible females were randomized) |

**Appendix**  
**Contraceptive Counseling in Clinical Settings: An Updated Systematic Review**  
**Zapata et al.**

|                       |              |                                                                          |                                                                                                                                                                                                                                                                                                                                                                                                                                                                                                                              |                                                       |                                                                                                                                                                                                                                                                                                                                                                                                                                    |                                                                                                                                                                                                                                                                                                                                                                                                                                                                                                                            |
|-----------------------|--------------|--------------------------------------------------------------------------|------------------------------------------------------------------------------------------------------------------------------------------------------------------------------------------------------------------------------------------------------------------------------------------------------------------------------------------------------------------------------------------------------------------------------------------------------------------------------------------------------------------------------|-------------------------------------------------------|------------------------------------------------------------------------------------------------------------------------------------------------------------------------------------------------------------------------------------------------------------------------------------------------------------------------------------------------------------------------------------------------------------------------------------|----------------------------------------------------------------------------------------------------------------------------------------------------------------------------------------------------------------------------------------------------------------------------------------------------------------------------------------------------------------------------------------------------------------------------------------------------------------------------------------------------------------------------|
| Teaching and Research | FU=12 months | smoking, diet); 62% white; 84% HS graduate or GED; 45% never married     | contraceptives and which method might be the most appropriate, and the opportunity for EC information and advance prescription; counselors evaluated participant pregnancy intention, contraceptive use patterns, and high risk sexual behaviors. Individualized risk reduction strategies discussed; participants obtained or received referral for any type of contraceptive; booster session focused on client progress toward meeting specific risk reduction steps and adopting consistent, effective contraceptive use | <u>Client experiences:</u> satisfaction with services | correct use (use during every act of intercourse) did not differ between intervention and control groups at any FU point<br><br>Intervention participants reported high levels of satisfaction (82% reported that it was helpful to talk to the educator about contraception, 90% reported that the educator had focused on their individual concerns, and 93% reported that all of their questions had been adequately addressed) | Comparable study groups related to age, education, marital status, and race/ethnicity<br><br>High completion rate (98% of intervention and 90% of control group)<br><br>FU rate $\leq$ 15% different for groups<br><br>FU time $\geq$ 1 year<br><br>Pregnancy tests used<br><br>Randomization assignment made using random numbers table<br><br>Allocation concealed<br><br><u>Weaknesses:</u><br>Recall bias<br><br>Self-report bias<br><br>Lack of blinding<br><br>Some participants had ambivalent pregnancy intentions |
| U.S.                  |              | Eligible and enrolled: n=737                                             |                                                                                                                                                                                                                                                                                                                                                                                                                                                                                                                              |                                                       |                                                                                                                                                                                                                                                                                                                                                                                                                                    |                                                                                                                                                                                                                                                                                                                                                                                                                                                                                                                            |
|                       |              | Complete FU data: n=329 in intervention group and n=335 in control group |                                                                                                                                                                                                                                                                                                                                                                                                                                                                                                                              |                                                       |                                                                                                                                                                                                                                                                                                                                                                                                                                    |                                                                                                                                                                                                                                                                                                                                                                                                                                                                                                                            |
|                       |              | Recruitment: approached by study personnel at primary healthcare setting |                                                                                                                                                                                                                                                                                                                                                                                                                                                                                                                              |                                                       |                                                                                                                                                                                                                                                                                                                                                                                                                                    |                                                                                                                                                                                                                                                                                                                                                                                                                                                                                                                            |
|                       |              |                                                                          | Single session                                                                                                                                                                                                                                                                                                                                                                                                                                                                                                               |                                                       |                                                                                                                                                                                                                                                                                                                                                                                                                                    |                                                                                                                                                                                                                                                                                                                                                                                                                                                                                                                            |

**Appendix**  
**Contraceptive Counseling in Clinical Settings: An Updated Systematic Review**  
**Zapata et al.**

|                                             |                                                                     |                                                                                                                                                                                    |                                                                                                                                                                                                                                                                                                                                                                                                                                                                                                                                                                                                                                                                                                                                                                                                                             |                                                                                           |                                                                                                                                                                                                                                                                                                     |                                                                                                  |
|---------------------------------------------|---------------------------------------------------------------------|------------------------------------------------------------------------------------------------------------------------------------------------------------------------------------|-----------------------------------------------------------------------------------------------------------------------------------------------------------------------------------------------------------------------------------------------------------------------------------------------------------------------------------------------------------------------------------------------------------------------------------------------------------------------------------------------------------------------------------------------------------------------------------------------------------------------------------------------------------------------------------------------------------------------------------------------------------------------------------------------------------------------------|-------------------------------------------------------------------------------------------|-----------------------------------------------------------------------------------------------------------------------------------------------------------------------------------------------------------------------------------------------------------------------------------------------------|--------------------------------------------------------------------------------------------------|
| Adams-Skinner (2009)                        | Prospective cohort study; 2 study groups                            | 78 sexually active females aged 15–32 years had counseling sessions audiotaped (n=36 in intervention group; n=42 in control group who received SOC); 92% non-white, 60% HS or less | Grounded in motivational interviewing and relapse prevention, focused on client adoption and continued use of dual-method contraception; nurses used semistructured counseling and decision-making tool to help clients select contraception; positive and negative aspects of chosen methods discussed; nurses helped clients anticipate difficulties they might encounter with consistently and correctly using selected methods and helped them identify solutions; individualized action plans of challenges and solutions provided in writing for client to take home; nurses scheduled subsequent call or FU appointments to reinforce method use; counseling session audiotaped and coded to measure 3 domains— promotion of dual protection, relapse prevention counseling, and quality of nurse-client interaction | <u>Medium-term</u> : increase contraceptive use (condoms)                                 | Among total sample, quality of nurse-client interaction was significantly ( $p<0.05$ ) associated with reduction of condom unprotected sex at 6 months FU, controlling for study group (client-defining behaviors, OR=1.57, 95% CI=1.25, 1.97; nurse-defining behaviors OR=1.60, 95% CI=1.04, 2.44) | Level II-2; high risk for bias                                                                   |
| NICHHD, National Institute of Mental Health | 4 community healthcare clinics serving underserved populations, NYC | 75/176 eligible females declined participation                                                                                                                                     |                                                                                                                                                                                                                                                                                                                                                                                                                                                                                                                                                                                                                                                                                                                                                                                                                             |                                                                                           |                                                                                                                                                                                                                                                                                                     | <u>Strengths</u> : Comparable study groups related to age, ethnicity, education, marital status. |
| U.S.                                        | FU=6 months                                                         | Recruitment: clients approached in waiting room of clinic                                                                                                                          |                                                                                                                                                                                                                                                                                                                                                                                                                                                                                                                                                                                                                                                                                                                                                                                                                             |                                                                                           | Among total sample, promotion of dual protection and relapse prevention techniques were not significantly associated with reduction of condom unprotected sex at 6 months FU, controlling for study group                                                                                           | Domain indices had moderate to high reliability                                                  |
|                                             |                                                                     |                                                                                                                                                                                    | Frequency: 2 contacts in 6 months                                                                                                                                                                                                                                                                                                                                                                                                                                                                                                                                                                                                                                                                                                                                                                                           |                                                                                           |                                                                                                                                                                                                                                                                                                     | <u>Weaknesses</u> : Selection bias                                                               |
|                                             |                                                                     |                                                                                                                                                                                    |                                                                                                                                                                                                                                                                                                                                                                                                                                                                                                                                                                                                                                                                                                                                                                                                                             |                                                                                           |                                                                                                                                                                                                                                                                                                     | Nonblinded coders                                                                                |
|                                             |                                                                     |                                                                                                                                                                                    |                                                                                                                                                                                                                                                                                                                                                                                                                                                                                                                                                                                                                                                                                                                                                                                                                             |                                                                                           |                                                                                                                                                                                                                                                                                                     | Recall bias                                                                                      |
|                                             |                                                                     |                                                                                                                                                                                    |                                                                                                                                                                                                                                                                                                                                                                                                                                                                                                                                                                                                                                                                                                                                                                                                                             |                                                                                           |                                                                                                                                                                                                                                                                                                     | Self-report bias                                                                                 |
|                                             |                                                                     |                                                                                                                                                                                    |                                                                                                                                                                                                                                                                                                                                                                                                                                                                                                                                                                                                                                                                                                                                                                                                                             |                                                                                           |                                                                                                                                                                                                                                                                                                     | Small sample                                                                                     |
|                                             |                                                                     |                                                                                                                                                                                    |                                                                                                                                                                                                                                                                                                                                                                                                                                                                                                                                                                                                                                                                                                                                                                                                                             |                                                                                           |                                                                                                                                                                                                                                                                                                     | <65% recruitment rate                                                                            |
|                                             |                                                                     |                                                                                                                                                                                    |                                                                                                                                                                                                                                                                                                                                                                                                                                                                                                                                                                                                                                                                                                                                                                                                                             |                                                                                           |                                                                                                                                                                                                                                                                                                     | Short FU time for behavioral outcomes                                                            |
| Langston (2010)                             | RCT; 2 study groups                                                 | 222 females aged 18–45 years post-abortion (n=114 in intervention group; n=108 in control group who received SOC); most Latina                                                     | Structured, standardized, nondirective counseling using a version of the WHO Decision-Making Tool; trained counselor read and displayed a                                                                                                                                                                                                                                                                                                                                                                                                                                                                                                                                                                                                                                                                                   | <u>Medium-term</u> : increase use of more effective methods, increase continuation of use | No significant differences between groups in choice of method (50% of intervention and 58% of control group selected a very effective method                                                                                                                                                        | Level I; moderate risk for bias                                                                  |
| Anonymous Foundation                        | Private practice setting; Columbia                                  |                                                                                                                                                                                    |                                                                                                                                                                                                                                                                                                                                                                                                                                                                                                                                                                                                                                                                                                                                                                                                                             |                                                                                           |                                                                                                                                                                                                                                                                                                     | <u>Strengths</u> : Comparable study groups related to                                            |
| U.S.                                        |                                                                     |                                                                                                                                                                                    |                                                                                                                                                                                                                                                                                                                                                                                                                                                                                                                                                                                                                                                                                                                                                                                                                             |                                                                                           |                                                                                                                                                                                                                                                                                                     |                                                                                                  |

**Appendix**  
**Contraceptive Counseling in Clinical Settings: An Updated Systematic Review**  
**Zapata et al.**

|                           |                                                             |                                                                                                                                                                                                                                                 |                                                                                                                                                                                                                                                                                                                                               |                                                                                    |
|---------------------------|-------------------------------------------------------------|-------------------------------------------------------------------------------------------------------------------------------------------------------------------------------------------------------------------------------------------------|-----------------------------------------------------------------------------------------------------------------------------------------------------------------------------------------------------------------------------------------------------------------------------------------------------------------------------------------------|------------------------------------------------------------------------------------|
| University Medical Center | (>85%) and HS graduates (>65%); 94% sought induced abortion | contraceptive flipchart in a private setting, with the various methods available for the participant to see and handle; counseling included both audio and visual components; participants were supplied note cards on which to write questions | (IUD, implant or sterilization); 42% of intervention and 34% of control group selected an effective method (injectable, ring, patch, or pill)                                                                                                                                                                                                 | background characteristics                                                         |
| FU=3 months               | 250 randomized/<br>380 screened                             | 3 month FU: n=96 for intervention and n=90 for control group                                                                                                                                                                                    | No significant differences between groups in continuation of chosen method at 3 months; among those choosing very effective methods, 3 month continuation rates were 85% and 77% for intervention and control groups; among those choosing effective methods, 3 month continuation rates were 68% and 68% for intervention and control groups | FU rate ≤15% different for groups (84% for intervention and 83% for control group) |
|                           | Recruitment: FP clinic referral to private practice         | Single session                                                                                                                                                                                                                                  |                                                                                                                                                                                                                                                                                                                                               | Providers received training on protocol                                            |
|                           |                                                             |                                                                                                                                                                                                                                                 |                                                                                                                                                                                                                                                                                                                                               | Randomization assignment made using random numbers table                           |
|                           |                                                             |                                                                                                                                                                                                                                                 |                                                                                                                                                                                                                                                                                                                                               | Allocation concealed                                                               |
|                           |                                                             |                                                                                                                                                                                                                                                 |                                                                                                                                                                                                                                                                                                                                               | <u>Weaknesses:</u><br>Selection bias                                               |
|                           |                                                             |                                                                                                                                                                                                                                                 |                                                                                                                                                                                                                                                                                                                                               | High attrition                                                                     |
|                           |                                                             |                                                                                                                                                                                                                                                 |                                                                                                                                                                                                                                                                                                                                               | Short FU time for behavioral outcomes                                              |
|                           |                                                             |                                                                                                                                                                                                                                                 |                                                                                                                                                                                                                                                                                                                                               | Lack of blinding                                                                   |
|                           |                                                             |                                                                                                                                                                                                                                                 |                                                                                                                                                                                                                                                                                                                                               | May not represent general FP clients (post-abortion sample)                        |
| Lee (2011)                | Cohort analysis of cross-sectional survey data              | 770 females aged 18–50 years; 94% white, NH; >85% at least some college                                                                                                                                                                         | Contraceptive counseling provided by primary care physician; may have included                                                                                                                                                                                                                                                                | <u>Medium-term:</u> increase contraceptive use                                     |
| Data funded by AHRQ; PI   |                                                             |                                                                                                                                                                                                                                                 |                                                                                                                                                                                                                                                                                                                                               | Participants who received counseling on any method had increased odds of           |
|                           |                                                             |                                                                                                                                                                                                                                                 |                                                                                                                                                                                                                                                                                                                                               | Level II-2; high risk for bias                                                     |
|                           |                                                             |                                                                                                                                                                                                                                                 |                                                                                                                                                                                                                                                                                                                                               | <u>Strengths:</u>                                                                  |

**Appendix**  
**Contraceptive Counseling in Clinical Settings: An Updated Systematic Review**  
**Zapata et al.**

|                                                              |                                                                                                                                                     |                                                                                                                                                                                                  |                                                                                                                                                                                                               |                                                            |                                                                                                                                                                                                                                                                                                                                                       |                                                                                                                                                                                                                                                                                                                                                                                                              |
|--------------------------------------------------------------|-----------------------------------------------------------------------------------------------------------------------------------------------------|--------------------------------------------------------------------------------------------------------------------------------------------------------------------------------------------------|---------------------------------------------------------------------------------------------------------------------------------------------------------------------------------------------------------------|------------------------------------------------------------|-------------------------------------------------------------------------------------------------------------------------------------------------------------------------------------------------------------------------------------------------------------------------------------------------------------------------------------------------------|--------------------------------------------------------------------------------------------------------------------------------------------------------------------------------------------------------------------------------------------------------------------------------------------------------------------------------------------------------------------------------------------------------------|
| funded by<br>NICHD<br>U.S.                                   | 4 primary care clinics,<br>Pennsylvania<br><br>FU=up to 1 month (7–30 days) post visit                                                              | Recruitment: invited to participate immediately after index visit                                                                                                                                | discussion of different contraceptive methods; little detail provided<br><br>Single session                                                                                                                   |                                                            | reporting use of a hormonal method at last intercourse (OR=2.68, CI=1.48, 4.87) vs those who did not receive counseling<br><br>Participants who received counseling about a specific method had increased odds of reporting use of that method at last intercourse (OR=4.78, CI=3.70, 11.37 for hormonal methods; OR=18.45, CI=4.88, 69.84 for LARCs) | Analyses adjusted for confounding variables<br><br><u>Weaknesses:</u><br>Recall bias<br><br>Not all patients received same counseling<br><br>Temporal order between counseling and contraceptive use uncertain<br><br>Short FU time for behavioral outcomes<br><br>Low response rate to survey (19%); responders were more likely to be white, have more education, and to be established patients at clinic |
| Rubenstein (2011) <sup>b</sup><br>Funding source<br>NR<br>UK | Retrospective cohort study; 2 study groups<br><br>Sexual health clinic, North London<br><br>Both physicians practiced patient-centered medicine and | 50 women (n=25 in intervention group and n=25 in control group)<br><br>Control group received a ‘cautious’ (‘are you really sure’) approach to counseling delivered by a single physician (women | ‘Just-try-it’ counseling approach, which consisted of encouraging patients to have an implant inserted and emphasizing the reversibility of the method, delivered by a single physician<br><br>Single session | <u>Medium-term:</u> increase continuation of use (implant) | Continuation rates were 80% for the ‘just-try-it’ approach and 92% for the ‘cautious approach’ (p=0.21)                                                                                                                                                                                                                                               | Level II-2; high risk for bias<br><br><u>Strengths:</u><br>Study groups age matched<br><br>Both physicians had more than 15 years of experience in specialist contraceptive care                                                                                                                                                                                                                             |

**Appendix**  
**Contraceptive Counseling in Clinical Settings: An Updated Systematic Review**  
**Zapata et al.**

|                            |                                                                                |                                                                                                                                                                                                                                                                                                     |                                              |                                                    |                                                                  |                                                                                                                                                                                                                                                                                                                                                                                                                                                                                                                                                                                                                                         |
|----------------------------|--------------------------------------------------------------------------------|-----------------------------------------------------------------------------------------------------------------------------------------------------------------------------------------------------------------------------------------------------------------------------------------------------|----------------------------------------------|----------------------------------------------------|------------------------------------------------------------------|-----------------------------------------------------------------------------------------------------------------------------------------------------------------------------------------------------------------------------------------------------------------------------------------------------------------------------------------------------------------------------------------------------------------------------------------------------------------------------------------------------------------------------------------------------------------------------------------------------------------------------------------|
|                            | completed a checklist to ensure all patients received all relevant information | <p>were advised to think carefully about having an implant inserted and the physician emphasized the risk and relative inconvenience of inserting and removing the implant)</p> <p>Recruitment: Telephone recruitment <math>\geq 12</math> months after implant insertion; 70% recruitment rate</p> |                                              |                                                    |                                                                  | <p>High (98%) participation rate among those contacted</p> <p>FU time <math>\geq 1</math> year</p> <p><u>Weaknesses:</u><br/>Single site</p> <p>Small sample</p> <p>Non-random allocation of patients to counseling approaches</p> <p>Only patients with adequately completed records were eligible for participation (possibly only 24% of patients, although unclear from report; those with incomplete records may have differed)</p> <p>Unknown if study groups were comparable and analyses not adjusted for potential confounders</p> <p>Recall bias (at least 1 year had elapsed between counseling and telephone interview)</p> |
| Madden (2013) <sup>b</sup> | Prospective cohort study; 2 study groups                                       | 7,637 women aged 14–45 years interested in starting                                                                                                                                                                                                                                                 | Structured, comprehensive counseling modeled | <u>Medium-term:</u> increase use of more effective | LARC uptake was lower at intervention vs control clinics (72% vs | Level II-2; moderate risk for bias                                                                                                                                                                                                                                                                                                                                                                                                                                                                                                                                                                                                      |

**Appendix**  
**Contraceptive Counseling in Clinical Settings: An Updated Systematic Review**  
**Zapata et al.**

|                                                              |                                                                                                  |                                                                                                                                                       |                                                                                                                                                                                                                                                                                                                                                                                                                                                                                |                                                                                                                                                                 |                                                                                                                                                                                                                                          |                                                                      |
|--------------------------------------------------------------|--------------------------------------------------------------------------------------------------|-------------------------------------------------------------------------------------------------------------------------------------------------------|--------------------------------------------------------------------------------------------------------------------------------------------------------------------------------------------------------------------------------------------------------------------------------------------------------------------------------------------------------------------------------------------------------------------------------------------------------------------------------|-----------------------------------------------------------------------------------------------------------------------------------------------------------------|------------------------------------------------------------------------------------------------------------------------------------------------------------------------------------------------------------------------------------------|----------------------------------------------------------------------|
| An anonymous foundation and the Eunice Kennedy Shriver NICHD | University clinic research site and 13 community partner clinics                                 | a new reversible contraceptive method (n=6,530 in intervention group and n=1,107 in control group who received SOC)                                   | after GATHER, a client-centered process focused on the woman, her expressed needs, situation, problems, issues and concerns; delivered by 54 research team members (most did not have formal healthcare training). Standardized script described effectiveness, advantages, and disadvantages of each reversible method in order of effectiveness. Participants were provided with physical models of methods during counseling and descriptions of LARC insertion procedures. | methods (LARC uptake)                                                                                                                                           | 78%, $p<0.0001$ ); however, both had very high LARC uptake.                                                                                                                                                                              | <u>Strengths:</u><br>Large sample                                    |
| U.S.                                                         | St. Louis City or County, Missouri                                                               | Women enrolled from intervention clinics were older, more likely to be white, insured, and nulliparous, and less likely to be Hispanic and of low SES | Single session                                                                                                                                                                                                                                                                                                                                                                                                                                                                 |                                                                                                                                                                 | By LARC type, IUD uptake was higher at intervention vs control clinics (58% vs 43%, ( $p<0.0001$ ); but implant uptake was lower (14% vs 35%, ( $p<0.0001$ ).                                                                            | Staff received training on protocol                                  |
|                                                              | All women received their method of choice at no cost.                                            |                                                                                                                                                       |                                                                                                                                                                                                                                                                                                                                                                                                                                                                                |                                                                                                                                                                 | After adjustment for confounders, there was no difference in LARC uptake between study groups (aRR=0.98; 95% CI=0.94, 1.02).                                                                                                             | Analyses adjusted for baseline differences between study groups      |
|                                                              | FU= immediately post-intervention                                                                | Recruitment: Self-referral                                                                                                                            |                                                                                                                                                                                                                                                                                                                                                                                                                                                                                |                                                                                                                                                                 |                                                                                                                                                                                                                                          | Statistical analyses conducted                                       |
|                                                              |                                                                                                  |                                                                                                                                                       |                                                                                                                                                                                                                                                                                                                                                                                                                                                                                |                                                                                                                                                                 |                                                                                                                                                                                                                                          | <u>Weaknesses:</u><br>Both study groups exposed to brief LARC script |
|                                                              |                                                                                                  |                                                                                                                                                       |                                                                                                                                                                                                                                                                                                                                                                                                                                                                                |                                                                                                                                                                 |                                                                                                                                                                                                                                          | SOC counseling may have varied widely across control sites           |
|                                                              |                                                                                                  |                                                                                                                                                       |                                                                                                                                                                                                                                                                                                                                                                                                                                                                                |                                                                                                                                                                 |                                                                                                                                                                                                                                          | No FU post-intervention                                              |
| Bommaraju (2015) <sup>b</sup>                                | Cohort analysis of program data; 2 study groups                                                  | 771 women not seeking pregnancy receiving gynecological services (mean age 28 years)                                                                  | Providers were trained to provide reproductive life plan counseling with an emphasis on shared decision-making: open a dialogue with patients about their future life plans and the impact of pregnancy and parenthood on these plans; discuss contraceptive options in                                                                                                                                                                                                        | <u>Medium-term:</u> increase use of more effective methods (LARC; DMPA; and pill/patch/ring vs no method or a nonmedical method [natural FP or barrier method]) | Results from multinomial logistic regression suggest reproductive life plan counseling may be associated with LARC use vs no method or a non-medical method (OR=1.6, CI=1.03, 2.61); but not associated with DMPA use or pill/patch/ring | Level II-2; high risk for bias                                       |
| No funding                                                   | Cincinnati-Hamilton County RH and Wellness Program (system of county primary care health centers | 74% black, 12% white, 15% Latina; 50% insured; 12% reported recent birth                                                                              |                                                                                                                                                                                                                                                                                                                                                                                                                                                                                |                                                                                                                                                                 |                                                                                                                                                                                                                                          | <u>Strengths:</u><br>Multiple sites                                  |
| U.S.                                                         |                                                                                                  |                                                                                                                                                       |                                                                                                                                                                                                                                                                                                                                                                                                                                                                                |                                                                                                                                                                 |                                                                                                                                                                                                                                          | Large sample                                                         |
|                                                              |                                                                                                  |                                                                                                                                                       |                                                                                                                                                                                                                                                                                                                                                                                                                                                                                |                                                                                                                                                                 |                                                                                                                                                                                                                                          | Data abstracted from electronic medical records                      |

**Appendix**  
**Contraceptive Counseling in Clinical Settings: An Updated Systematic Review**  
**Zapata et al.**

|                                         |                                                                                                                        |                                                                                                                                                                                                                                                                                                                                                             |                                                                                                                                                                      |                                                                                 |                                                                                                                                                                       |                                                                                                                                                                                                                                                                                                                                                               |
|-----------------------------------------|------------------------------------------------------------------------------------------------------------------------|-------------------------------------------------------------------------------------------------------------------------------------------------------------------------------------------------------------------------------------------------------------------------------------------------------------------------------------------------------------|----------------------------------------------------------------------------------------------------------------------------------------------------------------------|---------------------------------------------------------------------------------|-----------------------------------------------------------------------------------------------------------------------------------------------------------------------|---------------------------------------------------------------------------------------------------------------------------------------------------------------------------------------------------------------------------------------------------------------------------------------------------------------------------------------------------------------|
|                                         | receiving Title X funding), Ohio                                                                                       | 41.8% received reproductive life plan counseling                                                                                                                                                                                                                                                                                                            | order of typical use efficacy.<br><br>Providers were asked to mark in the medical record whether reproductive life plan counseling was provided.<br><br>Frequency NR |                                                                                 | use vs no method or a non-medical method.                                                                                                                             | Statistical analyses adjusted for potential confounders<br><br><u>Weaknesses:</u><br>Source database limited in scope; little detail available on actual counseling provided<br><br>Potential for misclassification bias in receipt of counseling                                                                                                             |
| Cha (2015) <sup>b</sup><br>AHRQ<br>U.S. | Cohort analysis of cross-sectional survey data; 2 study groups<br><br>Data from PRAMS, national sample<br><br>FU: None | 193,310 postpartum women with a recent live birth<br><br>9.1% <20; 23.8% 20–24; 28.8% 25–29; 23.7% 30–34; 14.6% 35+ years<br><br>63.6% married<br><br>62.2% white, non-Hispanic; 15.4% black, non-Hispanic; 15.9% Hispanic<br><br>80.2% received prenatal contraceptive counseling<br><br>Recruitment: women sampled to participate from birth certificates | Receipt of prenatal contraceptive counseling (coded as yes or no); no details provided<br><br>Frequency NR                                                           | <u>Medium-term:</u><br>increase contraceptive use (contraceptive use vs nonuse) | Women who received prenatal contraceptive counseling vs those who did not had increased odds of postpartum contraceptive use (81.7% vs 72.2%, OR=1.72, CI=1.64, 1.80) | Level II-2; high risk for bias<br><br><u>Strengths:</u><br>Large, national sample<br><br><u>Weaknesses:</u><br>Self-report bias<br><br>Self-selection bias<br><br>Response rate NR<br><br>No details on counseling<br><br>Limited details on contraceptive use<br><br>Statistical analysis of comparison of interest did not adjust for potential confounders |



**Appendix**  
**Contraceptive Counseling in Clinical Settings: An Updated Systematic Review**  
**Zapata et al.**

|                                |                                                                |                                                                                                        |                                                                                                                                                         |                                                                                                                                                        |                                                                                                                                                                                                                                                                                                       |                                                          |
|--------------------------------|----------------------------------------------------------------|--------------------------------------------------------------------------------------------------------|---------------------------------------------------------------------------------------------------------------------------------------------------------|--------------------------------------------------------------------------------------------------------------------------------------------------------|-------------------------------------------------------------------------------------------------------------------------------------------------------------------------------------------------------------------------------------------------------------------------------------------------------|----------------------------------------------------------|
|                                |                                                                |                                                                                                        |                                                                                                                                                         |                                                                                                                                                        |                                                                                                                                                                                                                                                                                                       | May not represent general FP clients (postpartum sample) |
| Zapata (2015) <sup>b</sup>     | Cohort analysis of cross-sectional survey data; 2 study groups | 9,536 postpartum women with a recent live birth                                                        | Receipt of prenatal and postpartum contraceptive counseling (none, 1, both); no details on counseling                                                   | <u>Medium-term:</u> increase contraceptive use (contraceptive use vs nonuse), increase use of more effective methods (sterilization, LARC or hormonal) | Compared with women who received no counseling, those counseled during 1 period (OR=2.01, CI=1.55, 2.59) and both time periods (OR=2.74, CI=2.18, 3.45) had increased odds of postpartum contraceptive use (69% vs 81% and 87%, respectively, <i>p</i> for trend <0.0001).                            | Level II-2; high risk for bias                           |
| No funding                     |                                                                |                                                                                                        |                                                                                                                                                         |                                                                                                                                                        |                                                                                                                                                                                                                                                                                                       | <u>Strengths:</u><br>Large sample                        |
| U.S.                           | PRAMS data from Missouri, NY, and NYC                          | 27.4% ≤24; 54.18% 25–34; 18.5% 35+ years                                                               | Frequency NR                                                                                                                                            |                                                                                                                                                        |                                                                                                                                                                                                                                                                                                       | Statistical analyses adjusted for potential confounders  |
|                                | FU: None                                                       | 58.1% white, non-Hispanic; 14.2% black, non-Hispanic; 20.9% Hispanic                                   |                                                                                                                                                         |                                                                                                                                                        |                                                                                                                                                                                                                                                                                                       | <u>Weaknesses:</u><br>Self-report bias                   |
|                                |                                                                | 78% received prenatal contraceptive counseling; 86% received postpartum counseling; 72% received both  |                                                                                                                                                         |                                                                                                                                                        | Compared with women who received no counseling, those counseled during 1 period (OR=2.10, CI=1.65, 2.67) and both time periods (OR=2.33, CI=1.87, 2.89) had increased odds of postpartum use of a more effective contraceptive method (32% vs 49% and 56%, respectively, <i>p</i> for trend <0.0001). | Self-selection bias                                      |
|                                |                                                                | Recruitment: women sampled to participate from birth certificates (reporting area response rates ≥65%) |                                                                                                                                                         |                                                                                                                                                        |                                                                                                                                                                                                                                                                                                       | No details on counseling                                 |
|                                |                                                                |                                                                                                        |                                                                                                                                                         |                                                                                                                                                        |                                                                                                                                                                                                                                                                                                       | May not represent general FP clients (postpartum sample) |
| Dehlendorf (2016) <sup>b</sup> | Prospective cohort study; 2 study groups                       | 348 women aged 16–53 years (mean 26.8 years) seen for contraceptive care                               | Counseling sessions were coded to examine: (1) patient-reported interpersonal quality of FP care measured based on dimensions of patient-centered care; | <u>Medium-term:</u> increase use of more effective methods (highly or moderately effective), increase continuation of use                              | Patients who reported high interpersonal quality of FP care were more likely to maintain use of their chosen contraceptive method at 6 months (45.6% vs                                                                                                                                               | Level II-2; moderate risk for bias                       |
| Minnis (2014) <sup>b</sup>     | 6 clinics in San Francisco (primary care,                      | 46% white; 28% black; 26% Latina                                                                       |                                                                                                                                                         |                                                                                                                                                        |                                                                                                                                                                                                                                                                                                       | <u>Strengths:</u><br>Multiple sites                      |

**Appendix**  
**Contraceptive Counseling in Clinical Settings: An Updated Systematic Review**  
**Zapata et al.**

|                                                   |                                                                                                           |                                                                                                                                                                       |                                                                                                                                                                                                                                                                                                                                                                                                                                                                                                                                                                                                                                                                                                                                                     |                                                                                                                                                                                                                                                                                                                                                                                                                                                                                                                                                                                                                                                                                           |                                                                                                                                                                                                                                                                                                                                                                                                                                                               |                                                                                                         |
|---------------------------------------------------|-----------------------------------------------------------------------------------------------------------|-----------------------------------------------------------------------------------------------------------------------------------------------------------------------|-----------------------------------------------------------------------------------------------------------------------------------------------------------------------------------------------------------------------------------------------------------------------------------------------------------------------------------------------------------------------------------------------------------------------------------------------------------------------------------------------------------------------------------------------------------------------------------------------------------------------------------------------------------------------------------------------------------------------------------------------------|-------------------------------------------------------------------------------------------------------------------------------------------------------------------------------------------------------------------------------------------------------------------------------------------------------------------------------------------------------------------------------------------------------------------------------------------------------------------------------------------------------------------------------------------------------------------------------------------------------------------------------------------------------------------------------------------|---------------------------------------------------------------------------------------------------------------------------------------------------------------------------------------------------------------------------------------------------------------------------------------------------------------------------------------------------------------------------------------------------------------------------------------------------------------|---------------------------------------------------------------------------------------------------------|
| Society of FP;<br>Eunice Kennedy<br>Shriver NICHD | STI/FP, and<br>general<br>OB/GYN sites)                                                                   | 48% never pregnant                                                                                                                                                    | and (2) interpersonal<br>communication<br>behaviors of clinicians<br>coded according to the<br>validated Four Habits<br>Coding Scheme.                                                                                                                                                                                                                                                                                                                                                                                                                                                                                                                                                                                                              | (of method<br>selected at index<br>visit), for<br>adolescent sub-<br>analysis: increase<br>continuation of use<br>(hormonal or<br>LARC)                                                                                                                                                                                                                                                                                                                                                                                                                                                                                                                                                   | 36.1%; OR=1.8,<br>CI=1.1, 3.0); and to be<br>using a highly or<br>moderately effective<br>method at 6 months<br>(66.0% vs 55.0%;<br>OR=2.0, CI=1.2, 3.5).                                                                                                                                                                                                                                                                                                     | Moderate sample<br><br>Sample size<br>calculations<br>conducted<br><br>High (91%)<br>participation rate |
| U.S.                                              | Counseling<br>provided by<br>licensed health<br>professionals<br>(NPs, PAs,<br>physicians);<br>94% by NPs | 84% and 86%<br>completed surveys<br>at 3 and 6 months                                                                                                                 | For adolescent sub-<br>analysis, counseling<br>sessions were coded as<br>either: (1) interactive<br>and appropriately<br>targeted (determined by<br>assessing the degree to<br>which providers<br>incorporated interactive<br>communication and<br>discussion of youth-<br>specific contextual<br>influences [e.g.,<br>lifestyle characteristics,<br>knowledge of method<br>use among friends and<br>family, role of peer<br>influence in method<br>chose and use]); or (2)<br>non-interactive (these<br>sessions failed to<br>engage youth and often<br>seemed to lead to<br>providers' choosing<br>what they thought was<br>the best option for the<br>patient, in some cases<br>with the chose shaped<br>by the availability of<br>free samples) | Patients were more<br>likely to report<br>continuous use of their<br>chosen method at 6<br>months when seen by<br>providers coded higher<br>on 'invests in the<br>beginning' (55.7% vs<br>36.8%; OR=2.3,<br>CI=1.2, 4.3) and 'elicits<br>the patient perspective'<br>(48.8% vs 38.1%;<br>OR=1.8, CI=1.01, 3.2).<br>Neither 'demonstrates<br>empathy' or 'invests in<br>the end' were<br>associated with<br>contraceptive<br>continuation.<br><br>No associations<br>between provider<br>communication<br>behaviors and use of a<br>highly or moderately<br>effective method at 6<br>months.<br><br>Among adolescents<br>only, use of a hormonal<br>or LARC method at 6<br>months was more | Transcripts of<br>audio-recorded<br>patient-provider<br>interactions were<br>coded by multiple<br>researchers<br><br>High completion<br>rates<br><br>Statistical analyses<br>adjusted for<br>potential<br>confounders<br><br>Validated scales<br>used to measure<br>interpersonal<br>quality of FP care<br>and interpersonal<br>communication<br>behaviors of<br>clinicians<br><br><u>Weaknesses:</u><br>Participation rates<br>not tracked<br>systematically |                                                                                                         |
|                                                   | FU: 3 and 6<br>months via<br>telephone<br>surveys                                                         | Sub-analysis<br>conducted among 67<br>adolescents aged<br>16–21 years<br>(median 19 years);<br>90% completed a<br>FU interview 3 or 6<br>months after clinic<br>visit | Single session                                                                                                                                                                                                                                                                                                                                                                                                                                                                                                                                                                                                                                                                                                                                      |                                                                                                                                                                                                                                                                                                                                                                                                                                                                                                                                                                                                                                                                                           |                                                                                                                                                                                                                                                                                                                                                                                                                                                               |                                                                                                         |

**Appendix**  
**Contraceptive Counseling in Clinical Settings: An Updated Systematic Review**  
**Zapata et al.**

|                                                                                                                |                                                                                                                                                                               |                                                                                                                                                                      |                                                                                                                                                                                                                                                                                                                                                                                                          |                                                                                                                                                                                                    |                                                                                                                                                                                                                                                                                                                                                                                    |                                                                                                                                                                                                                                                                                                                    |
|----------------------------------------------------------------------------------------------------------------|-------------------------------------------------------------------------------------------------------------------------------------------------------------------------------|----------------------------------------------------------------------------------------------------------------------------------------------------------------------|----------------------------------------------------------------------------------------------------------------------------------------------------------------------------------------------------------------------------------------------------------------------------------------------------------------------------------------------------------------------------------------------------------|----------------------------------------------------------------------------------------------------------------------------------------------------------------------------------------------------|------------------------------------------------------------------------------------------------------------------------------------------------------------------------------------------------------------------------------------------------------------------------------------------------------------------------------------------------------------------------------------|--------------------------------------------------------------------------------------------------------------------------------------------------------------------------------------------------------------------------------------------------------------------------------------------------------------------|
|                                                                                                                |                                                                                                                                                                               |                                                                                                                                                                      |                                                                                                                                                                                                                                                                                                                                                                                                          |                                                                                                                                                                                                    | common among adolescents who had received interactive and appropriately targeted counseling (80%) than among those who received non-interactive counseling (50%)                                                                                                                                                                                                                   | Short FU time for behavioral outcomes<br><br>Self-report bias<br><br>Women lost to FU were more likely to have lower income and education levels<br><br>May not represent general family planning clients (only 58% of adolescent sample stated that contraception-related concerns were primary reason for visit) |
| Whitaker (2016) <sup>b</sup>                                                                                   | RCT; 2 study groups                                                                                                                                                           | 60 women aged 15–29 years (mean 22.8 years) presenting for abortion (n=29 in intervention group; n=31 in control group who received non-standardized SOC counseling) | Motivational interviewing-based counseling with a trained counselor prior to returning to routine clinic flow, incorporating reflective listening, collaborative discussion of benefits and drawbacks of contraceptive methods, and avoidance of confrontation. Included 7 steps: (1) establish rapport; (2) set the agenda; (3) discuss prior contraceptive use; (4) ask permission to give educational | <u>Medium-term:</u> increase use of more effective methods (LARC; any effective method)<br><br><u>Client experiences:</u> satisfaction with services<br><br><u>Other:</u> intervention feasibility | More women in the intervention vs control group reported using a LARC method (65.5% vs 32.3%, $p=0.01$ , RR=2.03, CI=1.14, 3.61 at 1 month; 60.0% vs 30.8%, $p=0.05$ , RR=1.95, CI=1.01, 3.77 at 3 months).<br><br>Among subsample of women who had not intended to use LARC at baseline (n=40), more women in the intervention vs control group initiated a LARC method (46.7% vs | Level I; moderate risk for bias<br><br><u>Strengths:</u> Staff trained in motivational interviewing principles and skills<br><br>Randomization via sequentially numbered, sealed, opaque envelopes<br><br>Researchers blinded to group assignment                                                                  |
| NIH; University of Minnesota's Center for Leadership Education in Maternal and Child Public Health<br><br>U.S. | Urban academic clinic, Chicago<br><br>Arrangements for starting a contraceptive method, if the participant chose to start one, were performed during usual care for all women | 78% NH black, 10% Hispanic, 46% some college, 42% annual income <\$10,000, 53% parous<br><br>51 (85%) completed FU at 3 months                                       |                                                                                                                                                                                                                                                                                                                                                                                                          |                                                                                                                                                                                                    |                                                                                                                                                                                                                                                                                                                                                                                    |                                                                                                                                                                                                                                                                                                                    |

**Appendix**  
**Contraceptive Counseling in Clinical Settings: An Updated Systematic Review**  
**Zapata et al.**

|                                                                                                             |                                                                                                                  |                                                                                                                                                                                                                    |                                                                                                                                                                                                                                                                                                                                                                                                                              |                                                                                                                                                                                                                                                                                                                                                                                                                                                                                                                                                |
|-------------------------------------------------------------------------------------------------------------|------------------------------------------------------------------------------------------------------------------|--------------------------------------------------------------------------------------------------------------------------------------------------------------------------------------------------------------------|------------------------------------------------------------------------------------------------------------------------------------------------------------------------------------------------------------------------------------------------------------------------------------------------------------------------------------------------------------------------------------------------------------------------------|------------------------------------------------------------------------------------------------------------------------------------------------------------------------------------------------------------------------------------------------------------------------------------------------------------------------------------------------------------------------------------------------------------------------------------------------------------------------------------------------------------------------------------------------|
| <p>All women had same day access to LARC and DMPA at no cost</p> <p>FU=1, 3 months via telephone survey</p> | <p>Recruitment: staff approached potential participants at clinic (60/116 eligible patients recruited [52%])</p> | <p>information about contraceptive methods; (5) assess importance, confidence and readiness to use contraception; (6) continued discussion of very effective contraception; (7) wrap up.</p> <p>Single session</p> | <p>16.0%), but comparison ns.</p> <p>Use of any effective method (IUD or hormonal method) did not statistically differ between intervention and control groups (86.2% vs 74.2%, <math>p=0.34</math> at 1 month; 84.0% vs 61.5%, <math>p=0.12</math> at 3 months).</p> <p>At 3 months, more women in the intervention vs control group reported satisfaction with their counseling (92.0% vs 65.4%, <math>p=0.04</math>).</p> | <p>Quality assurance conducted to assess intervention fidelity</p> <p>Behavioral outcomes assessed at 1 month ascertained via electronic medical records</p> <p>High completion rate (92% at 1 month, 85% at 3 months)</p> <p>Excluded women with desire for repeat pregnancy within 6 months</p> <p><u>Weaknesses:</u><br/> Single site</p> <p>Allocation concealment NR</p> <p>Low recruitment rate (52%)</p> <p>Sample size calculations not conducted</p> <p>More women who at baseline intended to use LARC method post-abortion were</p> |
|-------------------------------------------------------------------------------------------------------------|------------------------------------------------------------------------------------------------------------------|--------------------------------------------------------------------------------------------------------------------------------------------------------------------------------------------------------------------|------------------------------------------------------------------------------------------------------------------------------------------------------------------------------------------------------------------------------------------------------------------------------------------------------------------------------------------------------------------------------------------------------------------------------|------------------------------------------------------------------------------------------------------------------------------------------------------------------------------------------------------------------------------------------------------------------------------------------------------------------------------------------------------------------------------------------------------------------------------------------------------------------------------------------------------------------------------------------------|

**Appendix**  
**Contraceptive Counseling in Clinical Settings: An Updated Systematic Review**  
**Zapata et al.**

|  |                                                                                                                                                                                                                                                                             |
|--|-----------------------------------------------------------------------------------------------------------------------------------------------------------------------------------------------------------------------------------------------------------------------------|
|  | <p>allocated to intervention group</p> <p>Completion rate by study group NR</p> <p>Behavioral outcomes assessed at 3 months ascertained via self-report</p> <p>Short FU time for behavioral outcomes</p> <p>May not represent general FP clients (post-abortion sample)</p> |
|--|-----------------------------------------------------------------------------------------------------------------------------------------------------------------------------------------------------------------------------------------------------------------------------|

<sup>a</sup>Adults and Adolescents

<sup>b</sup>Newly identified evidence since 2015 review.

ACOG, American College of Obstetricians and Gynecologists; AHRQ, Agency for Healthcare Research and Quality; CDC, Centers for Disease Control and Prevention; COC, combined oral contraceptive pill; CT, prospective nonrandomized controlled trial; DMPA, depot medroxyprogesterone acetate; EC, emergency contraception; FP, family planning; FU, follow-up; HR, hazard ratio; IUD, intrauterine device; IUS, intrauterine system; LARC, long-acting reversible contraception (intrauterine device or implant); NICHD, National Institute on Child Health and Human Development; NH, non-Hispanic; NR, not reported; NS, not significant; NYC, New York City; OB/GYN, obstetrics and gynecology; OC, oral contraceptive; PCP, primary care provider; PI, principle investigation; POP, progestin only pill; PRAMS, Pregnancy Risk Assessment Monitoring System; POS, point of service; RH, reproductive health; RR, adjusted relative risk; SOC, standard of care; STI, sexually transmitted infection; UIP, unintended pregnancy; UK, United Kingdom.
